# Supplementary material
Source: publisher site journal article supplement (https://www.dovepress.com/get_supplementary_file.php?f=496776.xlsx)
Supplement: Supplementary file 1 [file get_supplementary_file.php]

## Sheet: Sheet1
Supplement table: Initial modeling data
#ID	Time(h)	Dose(mg)	Infusion time(h)	Sampling date	Serum NVCM Concentrations (μg/mL)	EVID	GENDER	AGE	HT	WT	BMI	CRP	ALT	AST	ALP	TBIL	DBIL	Urea	Scr	CRCL	Bacterial culture result
1	0			2021-06-09	0	0	0	67	160	60	23.4375	37	16.1	7.9	60	11.1	5.4	2.3	44	103.44	Methicillin-resistant S. aureus
1	0.5	800	1			1	0	67	160	60	23.4375	37	16.1	7.9	60	11.1	5.4	2.3	44	103.44
1	2.5			2021-06-09	10.89	0	0	67	160	60	23.4375	37	16.1	7.9	60	11.1	5.4	2.3	44	103.44
1	12.5	800	1			1	0	67	160	60	23.4375	37	16.1	7.9	60	11.1	5.4	2.3	44	103.44
1	24.5	800	1			1	0	67	160	60	23.4375	37	16.1	7.9	60	11.1	5.4	2.3	44	103.44
1	36.5	800	1			1	0	67	160	60	23.4375	37	16.1	7.9	60	11.1	5.4	2.3	44	103.44
1	48			2021-06-11	5.17	0	0	67	160	60	23.4375	37	16.1	7.9	60	11.1	5.4	2.3	44	103.44
1	48.5	800	1			1	0	67	160	60	23.4375	37	16.1	7.9	60	11.1	5.4	2.3	44	103.44
1	51.5			2021-06-11	15.49	0	0	67	160	60	23.4375	37	16.1	7.9	60	11.1	5.4	2.3	44	103.44
1	60.5	800	1			1	0	67	160	60	23.4375	37	16.1	7.9	60	11.1	5.4	2.3	44	103.44
1	72.5	800	1			1	0	67	160	60	23.4375	37	16.1	7.9	60	11.1	5.4	2.3	44	103.44
1	84.5	800	1			1	0	67	160	60	23.4375	37	16.1	7.9	60	11.1	5.4	2.3	44	103.44
1	96.5	800	1			1	0	67	160	60	23.4375	37	16.1	7.9	60	11.1	5.4	2.3	44	103.44
1	108.5	800	1			1	0	67	160	60	23.4375	37	16.1	7.9	60	11.1	5.4	2.3	44	103.44
1	120.5	800	1			1	0	67	160	60	23.4375	37	16.1	7.9	60	11.1	5.4	2.3	44	103.44
1	132.5	800	1			1	0	67	160	60	23.4375	37	16.1	7.9	60	11.1	5.4	2.3	44	103.44
1	144.5	800	1			1	0	67	160	60	23.4375	37	16.1	7.9	60	11.1	5.4	2.3	44	103.44
1	156			2021-06-15	4.48	0	0	67	160	60	23.4375	37	16.1	7.9	60	11.1	5.4	2.3	44	103.44
1	156.5	800	1			1	0	67	160	60	23.4375	37	16.1	7.9	60	11.1	5.4	2.3	44	103.44
1	158.667			2021-06-15	18.36	0	0	67	160	60	23.4375	37	16.1	7.9	60	11.1	5.4	2.3	44	103.44
1	168.5	800	1			1	0	67	160	60	23.4375	37	16.1	7.9	60	11.1	5.4	2.3	44	103.44
1	180.5	800	1			1	0	67	160	60	23.4375	37	16.1	7.9	60	11.1	5.4	2.3	44	103.44
1	192.5	800	1			1	0	67	160	60	23.4375	37	16.1	7.9	60	11.1	5.4	2.3	44	103.44
1	204			2021-06-17	8.59	0	0	67	160	60	23.4375	37	16.1	7.9	60	11.1	5.4	2.3	44	103.44
1	204.5	800	1			1	0	67	160	60	23.4375	37	16.1	7.9	60	11.1	5.4	2.3	44	103.44
1	206.167			2021-06-17	32.8	0	0	67	160	60	23.4375	37	16.1	7.9	60	11.1	5.4	2.3	44	103.44
2	0			2021-10-14	0	0	0	57	160	75	29.2969	43	13.2	47.8	81	73.3	68.7	10.2	87	74.3508	Negative
2	0.5	800	1			1	0	57	160	75	29.2969	43	13.2	47.8	81	73.3	68.7	10.2	87	74.3508
2	2			2021-10-14	42.85	0	0	57	160	75	29.2969	43	13.2	47.8	81	73.3	68.7	10.2	87	74.3508
2	24.5	800	1			1	0	57	160	75	29.2969	43	13.2	47.8	81	73.3	68.7	10.2	87	74.3508
2	48.5	800	1			1	0	57	160	75	29.2969	43	13.2	47.8	81	73.3	68.7	10.2	87	74.3508
2	72			2021-10-15	12.05	0	0	57	160	75	29.2969	43	13.2	47.8	81	73.3	68.7	10.2	87	74.3508
2	72.5	800	1			1	0	57	160	75	29.2969	43	13.2	47.8	81	73.3	68.7	10.2	87	74.3508
2	74			2021-10-15	47.28	0	0	57	160	75	29.2969	43	13.2	47.8	81	73.3	68.7	10.2	87	74.3508
2	96.5	800	1			1	0	57	160	75	29.2969	43	13.2	47.8	81	73.3	68.7	10.2	87	74.3508
2	120			2021-10-16	11.02	0	0	57	160	75	29.2969	43	13.2	47.8	81	73.3	68.7	10.2	87	74.3508
2	120.5	800	1			1	0	57	160	75	29.2969	43	13.2	47.8	81	73.3	68.7	10.2	87	74.3508
2	122			2021-10-16	56.44	0	0	57	160	75	29.2969	43	13.2	47.8	81	73.3	68.7	10.2	87	74.3508
2	144.5	800	1			1	0	57	160	75	29.2969	43	13.2	47.8	81	73.3	68.7	10.2	87	74.3508
2	168			2021-10-17	19.26	0	0	57	160	75	29.2969	43	13.2	47.8	81	73.3	68.7	10.2	87	74.3508
2	168.5	800	1			1	0	57	160	75	29.2969	43	13.2	47.8	81	73.3	68.7	10.2	87	74.3508
3	0			2021-10-14	0	0	0	59	158	55	22.0317	17.2	49	35.3	69	13.3	5.2	17.5	130	35.6098	Negative
3	0.5	800	1			1	0	59	158	55	22.0317	17.2	49	35.3	69	13.3	5.2	17.5	130	35.6098
3	2.33333			2021-10-14	44.17	0	0	59	158	55	22.0317	17.2	49	35.3	69	13.3	5.2	17.5	130	35.6098
3	24.5	800	1			1	0	59	158	55	22.0317	17.2	49	35.3	69	13.3	5.2	17.5	130	35.6098
3	48.5	800	1			1	0	59	158	55	22.0317	17.2	49	35.3	69	13.3	5.2	17.5	130	35.6098
3	72.5	800	1			1	0	59	158	55	22.0317	17.2	49	35.3	69	13.3	5.2	17.5	130	35.6098
3	96			2021-10-16	11.63	0	0	59	158	55	22.0317	17.2	49	35.3	69	13.3	5.2	17.5	130	35.6098
3	96.5	800	1			1	0	59	158	55	22.0317	17.2	49	35.3	69	13.3	5.2	17.5	130	35.6098
3	97.5833			2021-10-16	93.61	0	0	59	158	55	22.0317	17.2	49	35.3	69	13.3	5.2	17.5	130	35.6098
3	120.5	800	1			1	0	59	158	55	22.0317	17.2	49	35.3	69	13.3	5.2	17.5	130	35.6098
3	144			2021-10-17	7.06	0	0	59	158	55	22.0317	17.2	49	35.3	69	13.3	5.2	17.5	130	35.6098
3	144.5	800	1			1	0	59	158	55	22.0317	17.2	49	35.3	69	13.3	5.2	17.5	130	35.6098
3	145.75			2021-10-17	75.8	0	0	59	158	55	22.0317	17.2	49	35.3	69	13.3	5.2	17.5	130	35.6098
4	0			2021-09-19	0	0	1	44	170	74	25.6055	112	49	22.3	115	5.1	2.5	3.5	58	149.734	Negative
4	0.5	800	1			1	1	44	170	74	25.6055	112	49	22.3	115	5.1	2.5	3.5	58	149.734
4	3.5			2021-09-19	8.09	0	1	44	170	74	25.6055	112	49	22.3	115	5.1	2.5	3.5	58	149.734
4	12.5	800	1			1	1	44	170	74	25.6055	112	49	22.3	115	5.1	2.5	3.5	58	149.734
4	24.5	800	1			1	1	44	170	74	25.6055	112	49	22.3	115	5.1	2.5	3.5	58	149.734
4	36.5	800	1			1	1	44	170	74	25.6055	112	49	22.3	115	5.1	2.5	3.5	58	149.734
4	48.5	800	1			1	1	44	170	74	25.6055	112	49	22.3	115	5.1	2.5	3.5	58	149.734
4	60.5	800	1			1	1	44	170	74	25.6055	112	49	22.3	115	5.1	2.5	3.5	58	149.734
4	72			2021-09-22	4.38	0	1	44	170	74	25.6055	112	49	22.3	115	5.1	2.5	3.5	58	149.734
4	72.5	800	1			1	1	44	170	74	25.6055	112	49	22.3	115	5.1	2.5	3.5	58	149.734
4	75.5			2021-09-22	13.04	0	1	44	170	74	25.6055	112	49	22.3	115	5.1	2.5	3.5	58	149.734
4	84.5	800	1			1	1	44	170	74	25.6055	112	49	22.3	115	5.1	2.5	3.5	58	149.734
4	96.5	800	1			1	1	44	170	74	25.6055	112	49	22.3	115	5.1	2.5	3.5	58	149.734
4	108.5	800	1			1	1	44	170	74	25.6055	112	49	22.3	115	5.1	2.5	3.5	58	149.734
4	120.5	800	1			1	1	44	170	74	25.6055	112	49	22.3	115	5.1	2.5	3.5	58	149.734
4	132.5	800	1			1	1	44	170	74	25.6055	112	49	22.3	115	5.1	2.5	3.5	58	149.734
4	144			2021-09-25	8.77	0	1	44	170	74	25.6055	112	49	22.3	115	5.1	2.5	3.5	58	149.734
4	144.5	800	1			1	1	44	170	74	25.6055	112	49	22.3	115	5.1	2.5	3.5	58	149.734
4	147.5			2021-09-25	14.71	0	1	44	170	74	25.6055	112	49	22.3	115	5.1	2.5	3.5	58	149.734
4	156.5	800	1			1	1	44	170	74	25.6055	112	49	22.3	115	5.1	2.5	3.5	58	149.734
4	168.5	800	1			1	1	44	170	74	25.6055	112	49	22.3	115	5.1	2.5	3.5	58	149.734
4	180.5	800	1			1	1	44	170	74	25.6055	112	49	22.3	115	5.1	2.5	3.5	58	149.734
5	0	800	1			1	1	61	165	50	18.3655	199.5	39.4	47.9	90	23.8	12.4	10.1	97	49.782	Negative
5	12	800	1			1	1	61	165	50	18.3655	199.5	39.4	47.9	90	23.8	12.4	10.1	97	49.782
5	23.5			2021-08-27	14	0	1	61	165	50	18.3655	199.5	39.4	47.9	90	23.8	12.4	10.1	97	49.782
5	24	800	1			1	1	61	165	50	18.3655	199.5	39.4	47.9	90	23.8	12.4	10.1	97	49.782
5	25.3333			2021-08-27	55.21	0	1	61	165	50	18.3655	199.5	39.4	47.9	90	23.8	12.4	10.1	97	49.782
5	36	800	1			1	1	61	165	50	18.3655	199.5	39.4	47.9	90	23.8	12.4	10.1	97	49.782
5	48	800	1			1	1	61	165	50	18.3655	199.5	39.4	47.9	90	23.8	12.4	10.1	97	49.782
5	60	800	1			1	1	61	165	50	18.3655	199.5	39.4	47.9	90	23.8	12.4	10.1	97	49.782
5	72	800	1			1	1	61	165	50	18.3655	199.5	39.4	47.9	90	23.8	12.4	10.1	97	49.782
5	84	800	1			1	1	61	165	50	18.3655	199.5	39.4	47.9	90	23.8	12.4	10.1	97	49.782
5	95.5			2021-08-30	25.08	0	1	61	165	50	18.3655	199.5	39.4	47.9	90	23.8	12.4	10.1	97	49.782
5	96	800	1			1	1	61	165	50	18.3655	199.5	39.4	47.9	90	23.8	12.4	10.1	97	49.782
5	97.5			2021-08-30	42.4	0	1	61	165	50	18.3655	199.5	39.4	47.9	90	23.8	12.4	10.1	97	49.782
5	108	800	1			1	1	61	165	50	18.3655	199.5	39.4	47.9	90	23.8	12.4	10.1	97	49.782
5	120	800	1			1	1	61	165	50	18.3655	199.5	39.4	47.9	90	23.8	12.4	10.1	97	49.782
5	132	800	1			1	1	61	165	50	18.3655	199.5	39.4	47.9	90	23.8	12.4	10.1	97	49.782
5	143.5			2021-09-01	24.26	0	1	61	165	50	18.3655	199.5	39.4	47.9	90	23.8	12.4	10.1	97	49.782
5	144	800	1			1	1	61	165	50	18.3655	199.5	39.4	47.9	90	23.8	12.4	10.1	97	49.782
5	145.5			2021-09-01	40.87	0	1	61	165	50	18.3655	199.5	39.4	47.9	90	23.8	12.4	10.1	97	49.782
5	156	800	1			1	1	61	165	50	18.3655	199.5	39.4	47.9	90	23.8	12.4	10.1	97	49.782
5	168	800	1			1	1	61	165	50	18.3655	199.5	39.4	47.9	90	23.8	12.4	10.1	97	49.782
5	180	800	1			1	1	61	165	50	18.3655	199.5	39.4	47.9	90	23.8	12.4	10.1	97	49.782
5	191.5			2021-09-03	26.65	0	1	61	165	50	18.3655	199.5	39.4	47.9	90	23.8	12.4	10.1	97	49.782
5	192	800	1			1	1	61	165	50	18.3655	199.5	39.4	47.9	90	23.8	12.4	10.1	97	49.782
5	193.167			2021-09-03	61.42	0	1	61	165	50	18.3655	199.5	39.4	47.9	90	23.8	12.4	10.1	97	49.782
5	204	800	1			1	1	61	165	50	18.3655	199.5	39.4	47.9	90	23.8	12.4	10.1	97	49.782
5	216	800	1			1	1	61	165	50	18.3655	199.5	39.4	47.9	90	23.8	12.4	10.1	97	49.782
5	228	800	1			1	1	61	165	50	18.3655	199.5	39.4	47.9	90	23.8	12.4	10.1	97	49.782
5	240	800	1			1	1	61	165	50	18.3655	199.5	39.4	47.9	90	23.8	12.4	10.1	97	49.782
5	252	800	1			1	1	61	165	50	18.3655	199.5	39.4	47.9	90	23.8	12.4	10.1	97	49.782
5	264	800	1			1	1	61	165	50	18.3655	199.5	39.4	47.9	90	23.8	12.4	10.1	97	49.782
6	0	800	1			1	1	32	170	68	23.5294	213.8	49	24.3	59	13.6	9.4	3.4	46	195.174	Methicillin-sensitive S. aureus
6	12	800	1			1	1	32	170	68	23.5294	213.8	49	24.3	59	13.6	9.4	3.4	46	195.174
6	24	800	1			1	1	32	170	68	23.5294	213.8	49	24.3	59	13.6	9.4	3.4	46	195.174
6	36	800	1			1	1	32	170	68	23.5294	213.8	49	24.3	59	13.6	9.4	3.4	46	195.174
6	47.5			2021-08-23	3.64	0	1	32	170	68	23.5294	213.8	49	24.3	59	13.6	9.4	3.4	46	195.174
6	48	800	1			1	1	32	170	68	23.5294	213.8	49	24.3	59	13.6	9.4	3.4	46	195.174
6	49.5			2021-08-23	22.22	0	1	32	170	68	23.5294	213.8	49	24.3	59	13.6	9.4	3.4	46	195.174
6	60	800	1			1	1	32	170	68	23.5294	213.8	49	24.3	59	13.6	9.4	3.4	46	195.174
6	72	800	1			1	1	32	170	68	23.5294	213.8	49	24.3	59	13.6	9.4	3.4	46	195.174
6	84	800	1			1	1	32	170	68	23.5294	213.8	49	24.3	59	13.6	9.4	3.4	46	195.174
6	96	800	1			1	1	32	170	68	23.5294	213.8	49	24.3	59	13.6	9.4	3.4	46	195.174
6	108	800	1			1	1	32	170	68	23.5294	213.8	49	24.3	59	13.6	9.4	3.4	46	195.174
6	120	800	1			1	1	32	170	68	23.5294	213.8	49	24.3	59	13.6	9.4	3.4	46	195.174
6	132	800	1			1	1	32	170	68	23.5294	213.8	49	24.3	59	13.6	9.4	3.4	46	195.174
6	144	800	1			1	1	32	170	68	23.5294	213.8	49	24.3	59	13.6	9.4	3.4	46	195.174
6	156	800	1			1	1	32	170	68	23.5294	213.8	49	24.3	59	13.6	9.4	3.4	46	195.174
6	168	800	1			1	1	32	170	68	23.5294	213.8	49	24.3	59	13.6	9.4	3.4	46	195.174
6	180	800	1			1	1	32	170	68	23.5294	213.8	49	24.3	59	13.6	9.4	3.4	46	195.174
6	192	800	1			1	1	32	170	68	23.5294	213.8	49	24.3	59	13.6	9.4	3.4	46	195.174
6	204	800	1			1	1	32	170	68	23.5294	213.8	49	24.3	59	13.6	9.4	3.4	46	195.174
6	215.583			2021-08-30	3.81	0	1	32	170	68	23.5294	213.8	49	24.3	59	13.6	9.4	3.4	46	195.174
6	216	800	1			1	1	32	170	68	23.5294	213.8	49	24.3	59	13.6	9.4	3.4	46	195.174
6	217.333			2021-08-30	38.76	0	1	32	170	68	23.5294	213.8	49	24.3	59	13.6	9.4	3.4	46	195.174
6	228	800	1			1	1	32	170	68	23.5294	213.8	49	24.3	59	13.6	9.4	3.4	46	195.174
6	240	800	1			1	1	32	170	68	23.5294	213.8	49	24.3	59	13.6	9.4	3.4	46	195.174
6	252	800	1			1	1	32	170	68	23.5294	213.8	49	24.3	59	13.6	9.4	3.4	46	195.174
6	264	800	1			1	1	32	170	68	23.5294	213.8	49	24.3	59	13.6	9.4	3.4	46	195.174
6	276	800	1			1	1	32	170	68	23.5294	213.8	49	24.3	59	13.6	9.4	3.4	46	195.174
6	288	800	1			1	1	32	170	68	23.5294	213.8	49	24.3	59	13.6	9.4	3.4	46	195.174
6	300	800	1			1	1	32	170	68	23.5294	213.8	49	24.3	59	13.6	9.4	3.4	46	195.174
6	312	800	1			1	1	32	170	68	23.5294	213.8	49	24.3	59	13.6	9.4	3.4	46	195.174
6	324	800	1			1	1	32	170	68	23.5294	213.8	49	24.3	59	13.6	9.4	3.4	46	195.174
6	336	800	1			1	1	32	170	68	23.5294	213.8	49	24.3	59	13.6	9.4	3.4	46	195.174
6	348	800	1			1	1	32	170	68	23.5294	213.8	49	24.3	59	13.6	9.4	3.4	46	195.174
6	360	800	1			1	1	32	170	68	23.5294	213.8	49	24.3	59	13.6	9.4	3.4	46	195.174
6	372	800	1			1	1	32	170	68	23.5294	213.8	49	24.3	59	13.6	9.4	3.4	46	195.174
6	383.5			2021-09-06	11.13	0	1	32	170	68	23.5294	213.8	49	24.3	59	13.6	9.4	3.4	46	195.174
6	384	800	1			1	1	32	170	68	23.5294	213.8	49	24.3	59	13.6	9.4	3.4	46	195.174
6	385.083			2021-09-06	47.16	0	1	32	170	68	23.5294	213.8	49	24.3	59	13.6	9.4	3.4	46	195.174
6	396	800	1			1	1	32	170	68	23.5294	213.8	49	24.3	59	13.6	9.4	3.4	46	195.174
7	0			2021-09-21	0	0	1	69	170	70	24.2215	21.7	66.2	71.5	92	11.1	6.7	4.7	64	94.9343	Methicillin-resistant S. aureus
7	0.5	800	1			1	1	69	170	70	24.2215	21.7	66.2	71.5	92	11.1	6.7	4.7	64	94.9343
7	1.91667			2021-09-21	34.98	0	1	69	170	70	24.2215	21.7	66.2	71.5	92	11.1	6.7	4.7	64	94.9343
7	11.1667	800	1			1	1	69	170	70	24.2215	21.7	66.2	71.5	92	11.1	6.7	4.7	64	94.9343
7	23.1667	800	1			1	1	69	170	70	24.2215	21.7	66.2	71.5	92	11.1	6.7	4.7	64	94.9343
7	33.1667			2021-09-22	11.7	0	1	69	170	70	24.2215	21.7	66.2	71.5	92	11.1	6.7	4.7	64	94.9343
7	33.6667	800	1			1	1	69	170	70	24.2215	21.7	66.2	71.5	92	11.1	6.7	4.7	64	94.9343
7	34.75			2021-09-22	46.59	0	1	69	170	70	24.2215	21.7	66.2	71.5	92	11.1	6.7	4.7	64	94.9343
7	45.6667	800	1			1	1	69	170	70	24.2215	21.7	66.2	71.5	92	11.1	6.7	4.7	64	94.9343
7	57.6667	800	1			1	1	69	170	70	24.2215	21.7	66.2	71.5	92	11.1	6.7	4.7	64	94.9343
7	69.6667	800	1			1	1	69	170	70	24.2215	21.7	66.2	71.5	92	11.1	6.7	4.7	64	94.9343
7	81.6667	800	1			1	1	69	170	70	24.2215	21.7	66.2	71.5	92	11.1	6.7	4.7	64	94.9343
7	93.6667	800	1			1	1	69	170	70	24.2215	21.7	66.2	71.5	92	11.1	6.7	4.7	64	94.9343
7	105.667	800	1			1	1	69	170	70	24.2215	21.7	66.2	71.5	92	11.1	6.7	4.7	64	94.9343
7	117.667	800	1			1	1	69	170	70	24.2215	21.7	66.2	71.5	92	11.1	6.7	4.7	64	94.9343
7	129.167			2021-09-26	10.67	0	1	69	170	70	24.2215	21.7	66.2	71.5	92	11.1	6.7	4.7	64	94.9343
7	129.667	800	1			1	1	69	170	70	24.2215	21.7	66.2	71.5	92	11.1	6.7	4.7	64	94.9343
7	131.667			2021-09-26	25.59	0	1	69	170	70	24.2215	21.7	66.2	71.5	92	11.1	6.7	4.7	64	94.9343
7	141.667	800	1			1	1	69	170	70	24.2215	21.7	66.2	71.5	92	11.1	6.7	4.7	64	94.9343
7	153.667	800	1			1	1	69	170	70	24.2215	21.7	66.2	71.5	92	11.1	6.7	4.7	64	94.9343
7	165.667	800	1			1	1	69	170	70	24.2215	21.7	66.2	71.5	92	11.1	6.7	4.7	64	94.9343
7	177.167			2021-09-28	12.69	0	1	69	170	70	24.2215	21.7	66.2	71.5	92	11.1	6.7	4.7	64	94.9343
7	177.667	800	1			1	1	69	170	70	24.2215	21.7	66.2	71.5	92	11.1	6.7	4.7	64	94.9343
7	178.75			2021-09-28	56.22	0	1	69	170	70	24.2215	21.7	66.2	71.5	92	11.1	6.7	4.7	64	94.9343
7	189.667	800	1			1	1	69	170	70	24.2215	21.7	66.2	71.5	92	11.1	6.7	4.7	64	94.9343
8	0			2021-04-29	0	0	1	64	170	60	20.7613	9.4	22	47	63	7.7	2.59	3.11	67	83.2026	Negative
8	0.5	800	1			1	1	64	170	60	20.7613	9.4	22	47	63	7.7	2.59	3.11	67	83.2026
8	2.33333			2021-04-29	25.1	0	1	64	170	60	20.7613	9.4	22	47	63	7.7	2.59	3.11	67	83.2026
8	12.5	800	1			1	1	64	170	60	20.7613	9.4	22	47	63	7.7	2.59	3.11	67	83.2026
8	24			2021-04-30	5.72	0	1	64	170	60	20.7613	9.4	22	47	63	7.7	2.59	3.11	67	83.2026
8	24.5	800	1			1	1	64	170	60	20.7613	9.4	22	47	63	7.7	2.59	3.11	67	83.2026
8	26.5			2021-04-30	22.53	0	1	64	170	60	20.7613	9.4	22	47	63	7.7	2.59	3.11	67	83.2026
8	36.5	800	1			1	1	64	170	60	20.7613	9.4	22	47	63	7.7	2.59	3.11	67	83.2026
8	48.5	800	1			1	1	64	170	60	20.7613	9.4	22	47	63	7.7	2.59	3.11	67	83.2026
8	60.5	800	1			1	1	64	170	60	20.7613	9.4	22	47	63	7.7	2.59	3.11	67	83.2026
8	72.5	800	1			1	1	64	170	60	20.7613	9.4	22	47	63	7.7	2.59	3.11	67	83.2026
8	84.5	800	1			1	1	64	170	60	20.7613	9.4	22	47	63	7.7	2.59	3.11	67	83.2026
8	96.5	800	1			1	1	64	170	60	20.7613	9.4	22	47	63	7.7	2.59	3.11	67	83.2026
8	108.5	800	1			1	1	64	170	60	20.7613	9.4	22	47	63	7.7	2.59	3.11	67	83.2026
8	120			2021-05-04	8.13	0	1	64	170	60	20.7613	9.4	22	47	63	7.7	2.59	3.11	67	83.2026
8	120.5	800	1			1	1	64	170	60	20.7613	9.4	22	47	63	7.7	2.59	3.11	67	83.2026
8	121.667			2021-05-04	32.6	0	1	64	170	60	20.7613	9.4	22	47	63	7.7	2.59	3.11	67	83.2026
8	132.5	800	1			1	1	64	170	60	20.7613	9.4	22	47	63	7.7	2.59	3.11	67	83.2026
9	0			2021-08-10	0	0	0	34	165	60	22.0386	202	16.8	19.1	73	5.5	3.4	1.9	52	127.092	Negative
9	0.583333	800	1			1	0	34	165	60	22.0386	202	16.8	19.1	73	5.5	3.4	1.9	52	127.092
9	2.08333			2021-08-10	30.06	0	0	34	165	60	22.0386	202	16.8	19.1	73	5.5	3.4	1.9	52	127.092
9	17.5833	800	1			1	0	34	165	60	22.0386	202	16.8	19.1	73	5.5	3.4	1.9	52	127.092
9	29.5833	800	1			1	0	34	165	60	22.0386	202	16.8	19.1	73	5.5	3.4	1.9	52	127.092
9	41.5833	800	1			1	0	34	165	60	22.0386	202	16.8	19.1	73	5.5	3.4	1.9	52	127.092
9	53.0833			2021-08-12	4.06	0	0	34	165	60	22.0386	202	16.8	19.1	73	5.5	3.4	1.9	52	127.092
9	53.5833	800	1			1	0	34	165	60	22.0386	202	16.8	19.1	73	5.5	3.4	1.9	52	127.092
9	55.0833			2021-08-12	32.2	0	0	34	165	60	22.0386	202	16.8	19.1	73	5.5	3.4	1.9	52	127.092
9	65.5833	800	1			1	0	34	165	60	22.0386	202	16.8	19.1	73	5.5	3.4	1.9	52	127.092
9	77.5833	800	1			1	0	34	165	60	22.0386	202	16.8	19.1	73	5.5	3.4	1.9	52	127.092
9	89.5833	800	1			1	0	34	165	60	22.0386	202	16.8	19.1	73	5.5	3.4	1.9	52	127.092
9	101.583	800	1			1	0	34	165	60	22.0386	202	16.8	19.1	73	5.5	3.4	1.9	52	127.092
9	113.583	800	1			1	0	34	165	60	22.0386	202	16.8	19.1	73	5.5	3.4	1.9	52	127.092
9	125.583	800	1			1	0	34	165	60	22.0386	202	16.8	19.1	73	5.5	3.4	1.9	52	127.092
9	137.583	800	1			1	0	34	165	60	22.0386	202	16.8	19.1	73	5.5	3.4	1.9	52	127.092
9	149.083			2021-08-16	4	0	0	34	165	60	22.0386	202	16.8	19.1	73	5.5	3.4	1.9	52	127.092
9	149.583	800	1			1	0	34	165	60	22.0386	202	16.8	19.1	73	5.5	3.4	1.9	52	127.092
9	152.083			2021-08-16	12.88	0	0	34	165	60	22.0386	202	16.8	19.1	73	5.5	3.4	1.9	52	127.092
9	161.583	800	1			1	0	34	165	60	22.0386	202	16.8	19.1	73	5.5	3.4	1.9	52	127.092
9	173.583	800	1			1	0	34	165	60	22.0386	202	16.8	19.1	73	5.5	3.4	1.9	52	127.092
9	185.583	800	1			1	0	34	165	60	22.0386	202	16.8	19.1	73	5.5	3.4	1.9	52	127.092
9	197.583	800	1			1	0	34	165	60	22.0386	202	16.8	19.1	73	5.5	3.4	1.9	52	127.092
9	209.583	800	1			1	0	34	165	60	22.0386	202	16.8	19.1	73	5.5	3.4	1.9	52	127.092
9	221.583	800	1			1	0	34	165	60	22.0386	202	16.8	19.1	73	5.5	3.4	1.9	52	127.092
9	233.583	800	1			1	0	34	165	60	22.0386	202	16.8	19.1	73	5.5	3.4	1.9	52	127.092
9	245.583	800	1			1	0	34	165	60	22.0386	202	16.8	19.1	73	5.5	3.4	1.9	52	127.092
9	257.583	800	1			1	0	34	165	60	22.0386	202	16.8	19.1	73	5.5	3.4	1.9	52	127.092
9	269.583	800	1			1	0	34	165	60	22.0386	202	16.8	19.1	73	5.5	3.4	1.9	52	127.092
9	281.583	800	1			1	0	34	165	60	22.0386	202	16.8	19.1	73	5.5	3.4	1.9	52	127.092
9	293.583	800	1			1	0	34	165	60	22.0386	202	16.8	19.1	73	5.5	3.4	1.9	52	127.092
9	305.583	800	1			1	0	34	165	60	22.0386	202	16.8	19.1	73	5.5	3.4	1.9	52	127.092
9	317.583	800	1			1	0	34	165	60	22.0386	202	16.8	19.1	73	5.5	3.4	1.9	52	127.092
9	329.583	800	1			1	0	34	165	60	22.0386	202	16.8	19.1	73	5.5	3.4	1.9	52	127.092
9	341.583	800	1			1	0	34	165	60	22.0386	202	16.8	19.1	73	5.5	3.4	1.9	52	127.092
9	353.583	800	1			1	0	34	165	60	22.0386	202	16.8	19.1	73	5.5	3.4	1.9	52	127.092
9	365.583	800	1			1	0	34	165	60	22.0386	202	16.8	19.1	73	5.5	3.4	1.9	52	127.092
9	377.583	800	1			1	0	34	165	60	22.0386	202	16.8	19.1	73	5.5	3.4	1.9	52	127.092
9	389.583	800	1			1	0	34	165	60	22.0386	202	16.8	19.1	73	5.5	3.4	1.9	52	127.092
9	401.583	800	1			1	0	34	165	60	22.0386	202	16.8	19.1	73	5.5	3.4	1.9	52	127.092
9	413.583	800	1			1	0	34	165	60	22.0386	202	16.8	19.1	73	5.5	3.4	1.9	52	127.092
9	425.583	800	1			1	0	34	165	60	22.0386	202	16.8	19.1	73	5.5	3.4	1.9	52	127.092
9	437.583	800	1			1	0	34	165	60	22.0386	202	16.8	19.1	73	5.5	3.4	1.9	52	127.092
9	449.583	800	1			1	0	34	165	60	22.0386	202	16.8	19.1	73	5.5	3.4	1.9	52	127.092
9	461.083			2021-08-29	5.6	0	0	34	165	60	22.0386	202	16.8	19.1	73	5.5	3.4	1.9	52	127.092
9	461.583	800	1			1	0	34	165	60	22.0386	202	16.8	19.1	73	5.5	3.4	1.9	52	127.092
9	463.083			2021-08-29	30.86	0	0	34	165	60	22.0386	202	16.8	19.1	73	5.5	3.4	1.9	52	127.092
10	0			2021-11-11	0	0	0	73	155	70	29.1363	6.3	13	13	77	2.63	2.2	4.15	70	69.621	Negative
10	0.5	800	1			1	0	73	155	70	29.1363	6.3	13	13	77	2.63	2.2	4.15	70	69.621
10	1.58333			2021-11-11	60.68	0	0	73	155	70	29.1363	6.3	13	13	77	2.63	2.2	4.15	70	69.621
10	12.5	800	1			1	0	73	155	70	29.1363	6.3	13	13	77	2.63	2.2	4.15	70	69.621
10	24.5	800	1			1	0	73	155	70	29.1363	6.3	13	13	77	2.63	2.2	4.15	70	69.621
10	36.5	800	1			1	0	73	155	70	29.1363	6.3	13	13	77	2.63	2.2	4.15	70	69.621
10	48.5	800	1			1	0	73	155	70	29.1363	6.3	13	13	77	2.63	2.2	4.15	70	69.621
10	60.5	800	1			1	0	73	155	70	29.1363	6.3	13	13	77	2.63	2.2	4.15	70	69.621
10	72.5	800	1			1	0	73	155	70	29.1363	6.3	13	13	77	2.63	2.2	4.15	70	69.621
10	84.5	800	1			1	0	73	155	70	29.1363	6.3	13	13	77	2.63	2.2	4.15	70	69.621
10	96.5	800	1			1	0	73	155	70	29.1363	6.3	13	13	77	2.63	2.2	4.15	70	69.621
10	108.5	800	1			1	0	73	155	70	29.1363	6.3	13	13	77	2.63	2.2	4.15	70	69.621
10	120.5	800	1			1	0	73	155	70	29.1363	6.3	13	13	77	2.63	2.2	4.15	70	69.621
10	132.5	800	1			1	0	73	155	70	29.1363	6.3	13	13	77	2.63	2.2	4.15	70	69.621
10	144			2021-11-17	19.01	0	0	73	155	70	29.1363	6.3	13	13	77	2.63	2.2	4.15	70	69.621
10	144.5	800	1			1	0	73	155	70	29.1363	6.3	13	13	77	2.63	2.2	4.15	70	69.621
10	146			2021-11-17	39.9	0	0	73	155	70	29.1363	6.3	13	13	77	2.63	2.2	4.15	70	69.621
10	156.5	800	1			1	0	73	155	70	29.1363	6.3	13	13	77	2.63	2.2	4.15	70	69.621
10	168.5	800	1			1	0	73	155	70	29.1363	6.3	13	13	77	2.63	2.2	4.15	70	69.621
10	180.5	800	1			1	0	73	155	70	29.1363	6.3	13	13	77	2.63	2.2	4.15	70	69.621
10	192.5	800	1			1	0	73	155	70	29.1363	6.3	13	13	77	2.63	2.2	4.15	70	69.621
10	204.5	800	1			1	0	73	155	70	29.1363	6.3	13	13	77	2.63	2.2	4.15	70	69.621
10	216			2021-11-20	23.99	0	0	73	155	70	29.1363	6.3	13	13	77	2.63	2.2	4.15	70	69.621
10	216.5	800	1			1	0	73	155	70	29.1363	6.3	13	13	77	2.63	2.2	4.15	70	69.621
10	217.583			2021-11-20	72.22	0	0	73	155	70	29.1363	6.3	13	13	77	2.63	2.2	4.15	70	69.621
11	0			2021-12-16	0	0	1	30	178	76	23.9869	50.6	20.7	13.9	187	5.8	7.15	3	81	126.173	Negative
11	0.5	800	1			1	1	30	178	76	23.9869	50.6	20.7	13.9	187	5.8	7.15	3	81	126.173
11	3			2021-12-16	20.53	0	1	30	178	76	23.9869	50.6	20.7	13.9	187	5.8	7.15	3	81	126.173
11	12.5	800	1			1	1	30	178	76	23.9869	50.6	20.7	13.9	187	5.8	7.15	3	81	126.173
11	24.5	800	1			1	1	30	178	76	23.9869	50.6	20.7	13.9	187	5.8	7.15	3	81	126.173
11	36.5	800	1			1	1	30	178	76	23.9869	50.6	20.7	13.9	187	5.8	7.15	3	81	126.173
11	48.1			2021-12-18	3.41	0	1	30	178	76	23.9869	50.6	20.7	13.9	187	5.8	7.15	3	81	126.173
11	48.5	800	1			1	1	30	178	76	23.9869	50.6	20.7	13.9	187	5.8	7.15	3	81	126.173
11	51			2021-12-18	25.44	0	1	30	178	76	23.9869	50.6	20.7	13.9	187	5.8	7.15	3	81	126.173
11	60.5	800	1			1	1	30	178	76	23.9869	50.6	20.7	13.9	187	5.8	7.15	3	81	126.173
11	72.5	800	1			1	1	30	178	76	23.9869	50.6	20.7	13.9	187	5.8	7.15	3	81	126.173
11	84.5	800	1			1	1	30	178	76	23.9869	50.6	20.7	13.9	187	5.8	7.15	3	81	126.173
11	96.0833			2021-12-20	3.81	0	1	30	178	76	23.9869	50.6	20.7	13.9	187	5.8	7.15	3	81	126.173
11	96.5	800	1			1	1	30	178	76	23.9869	50.6	20.7	13.9	187	5.8	7.15	3	81	126.173
11	99			2021-12-20	24.15	0	1	30	178	76	23.9869	50.6	20.7	13.9	187	5.8	7.15	3	81	126.173
12	0			2020-12-02	0	0	0	35	160	72	28.125	8.3	41.4	20.8	87	4.8	2	2.1	55	142.832	Negative
12	0.5	800	1			1	0	35	160	72	28.125	8.3	41.4	20.8	87	4.8	2	2.1	55	142.832
12	3.5			2020-12-02	6.88	0	0	35	160	72	28.125	8.3	41.4	20.8	87	4.8	2	2.1	55	142.832
12	12.5	800	1			1	0	35	160	72	28.125	8.3	41.4	20.8	87	4.8	2	2.1	55	142.832
12	24.5	800	1			1	0	35	160	72	28.125	8.3	41.4	20.8	87	4.8	2	2.1	55	142.832
12	36.5	800	1			1	0	35	160	72	28.125	8.3	41.4	20.8	87	4.8	2	2.1	55	142.832
12	48			2020-12-04	4.87	0	0	35	160	72	28.125	8.3	41.4	20.8	87	4.8	2	2.1	55	142.832
12	48.5	800	1			1	0	35	160	72	28.125	8.3	41.4	20.8	87	4.8	2	2.1	55	142.832
12	50.5			2020-12-04	32.15	0	0	35	160	72	28.125	8.3	41.4	20.8	87	4.8	2	2.1	55	142.832
12	60.5	800	1			1	0	35	160	72	28.125	8.3	41.4	20.8	87	4.8	2	2.1	55	142.832
12	72.5	800	1			1	0	35	160	72	28.125	8.3	41.4	20.8	87	4.8	2	2.1	55	142.832
12	84.5	800	1			1	0	35	160	72	28.125	8.3	41.4	20.8	87	4.8	2	2.1	55	142.832
12	96.5	800	1			1	0	35	160	72	28.125	8.3	41.4	20.8	87	4.8	2	2.1	55	142.832
12	108.5	800	1			1	0	35	160	72	28.125	8.3	41.4	20.8	87	4.8	2	2.1	55	142.832
12	120.5	800	1			1	0	35	160	72	28.125	8.3	41.4	20.8	87	4.8	2	2.1	55	142.832
12	132.5	800	1			1	0	35	160	72	28.125	8.3	41.4	20.8	87	4.8	2	2.1	55	142.832
12	143.983			2020-12-08	5.69	0	0	35	160	72	28.125	8.3	41.4	20.8	87	4.8	2	2.1	55	142.832
12	144.5	800	1			1	0	35	160	72	28.125	8.3	41.4	20.8	87	4.8	2	2.1	55	142.832
12	146.733			2020-12-08	24.24	0	0	35	160	72	28.125	8.3	41.4	20.8	87	4.8	2	2.1	55	142.832
13	0			2021-11-24	0	0	1	52	170	75	25.9516	79.4	3.4	6.8	101	13.1	6.2	1.9	54	149.416	Negative
13	0.5	800	1			1	1	52	170	75	25.9516	79.4	3.4	6.8	101	13.1	6.2	1.9	54	149.416
13	3.5			2021-11-24	28.01	0	1	52	170	75	25.9516	79.4	3.4	6.8	101	13.1	6.2	1.9	54	149.416
13	12.5	800	1			1	1	52	170	75	25.9516	79.4	3.4	6.8	101	13.1	6.2	1.9	54	149.416
13	24.5	800	1			1	1	52	170	75	25.9516	79.4	3.4	6.8	101	13.1	6.2	1.9	54	149.416
13	36.5	800	1			1	1	52	170	75	25.9516	79.4	3.4	6.8	101	13.1	6.2	1.9	54	149.416
13	48			2021-11-26	17.54	0	1	52	170	75	25.9516	79.4	3.4	6.8	101	13.1	6.2	1.9	54	149.416
13	48.5	800	1			1	1	52	170	75	25.9516	79.4	3.4	6.8	101	13.1	6.2	1.9	54	149.416
13	51.75			2021-11-26	28.5	0	1	52	170	75	25.9516	79.4	3.4	6.8	101	13.1	6.2	1.9	54	149.416
13	60.5	800	1			1	1	52	170	75	25.9516	79.4	3.4	6.8	101	13.1	6.2	1.9	54	149.416
13	72.5	800	1			1	1	52	170	75	25.9516	79.4	3.4	6.8	101	13.1	6.2	1.9	54	149.416
13	84.5	800	1			1	1	52	170	75	25.9516	79.4	3.4	6.8	101	13.1	6.2	1.9	54	149.416
13	96			2021-11-28	15.3	0	1	52	170	75	25.9516	79.4	3.4	6.8	101	13.1	6.2	1.9	54	149.416
13	96.5	800	1			1	1	52	170	75	25.9516	79.4	3.4	6.8	101	13.1	6.2	1.9	54	149.416
13	98.3333			2021-11-28	36.96	0	1	52	170	75	25.9516	79.4	3.4	6.8	101	13.1	6.2	1.9	54	149.416
13	108.5	800	1			1	1	52	170	75	25.9516	79.4	3.4	6.8	101	13.1	6.2	1.9	54	149.416
14	0			2021-12-13	0	0	0	53	163	51	19.1953	6.52	20.1	28.9	93	19.1	10.9	3.4	63	73.1837	Methicillin-sensitive S. aureus
14	0.166667	800	1			1	0	53	163	51	19.1953	6.52	20.1	28.9	93	19.1	10.9	3.4	63	73.1837
14	12.1667	800	1			1	0	53	163	51	19.1953	6.52	20.1	28.9	93	19.1	10.9	3.4	63	73.1837
14	24.1667	800	1			1	0	53	163	51	19.1953	6.52	20.1	28.9	93	19.1	10.9	3.4	63	73.1837
14	36.1667	800	1			1	0	53	163	51	19.1953	6.52	20.1	28.9	93	19.1	10.9	3.4	63	73.1837
14	47.6667			2021-12-15	13.31	0	0	53	163	51	19.1953	6.52	20.1	28.9	93	19.1	10.9	3.4	63	73.1837
14	48.1667	800	1			1	0	53	163	51	19.1953	6.52	20.1	28.9	93	19.1	10.9	3.4	63	73.1837
14	49.25			2021-12-15	53.44	0	0	53	163	51	19.1953	6.52	20.1	28.9	93	19.1	10.9	3.4	63	73.1837
14	60.1667	800	1			1	0	53	163	51	19.1953	6.52	20.1	28.9	93	19.1	10.9	3.4	63	73.1837
14	72.1667	800	1			1	0	53	163	51	19.1953	6.52	20.1	28.9	93	19.1	10.9	3.4	63	73.1837
14	84.1667	800	1			1	0	53	163	51	19.1953	6.52	20.1	28.9	93	19.1	10.9	3.4	63	73.1837
14	95.6667			2021-12-17	15.93	0	0	53	163	51	19.1953	6.52	20.1	28.9	93	19.1	10.9	3.4	63	73.1837
14	96.1667	800	1			1	0	53	163	51	19.1953	6.52	20.1	28.9	93	19.1	10.9	3.4	63	73.1837
14	97.25			2021-12-17	55.84	0	0	53	163	51	19.1953	6.52	20.1	28.9	93	19.1	10.9	3.4	63	73.1837
15	0			2021-11-26	0	0	0	44	163	74	27.852	13.2	49.4	34.4	107	20.1	2.6	4.8	56	131.82	Methicillin-sensitive S. aureus
15	0.5	800	1			1	0	44	163	74	27.852	13.2	49.4	34.4	107	20.1	2.6	4.8	56	131.82
15	2.5			2021-11-26	32.11	0	0	44	163	74	27.852	13.2	49.4	34.4	107	20.1	2.6	4.8	56	131.82
15	12.5	800	1			1	0	44	163	74	27.852	13.2	49.4	34.4	107	20.1	2.6	4.8	56	131.82
15	24.5	800	1			1	0	44	163	74	27.852	13.2	49.4	34.4	107	20.1	2.6	4.8	56	131.82
15	36.5	800	1			1	0	44	163	74	27.852	13.2	49.4	34.4	107	20.1	2.6	4.8	56	131.82
15	48			2021-11-28	16	0	0	44	163	74	27.852	13.2	49.4	34.4	107	20.1	2.6	4.8	56	131.82
15	48.5	800	1			1	0	44	163	74	27.852	13.2	49.4	34.4	107	20.1	2.6	4.8	56	131.82
15	49.5833			2021-11-28	58.32	0	0	44	163	74	27.852	13.2	49.4	34.4	107	20.1	2.6	4.8	56	131.82
15	60.5	800	1			1	0	44	163	74	27.852	13.2	49.4	34.4	107	20.1	2.6	4.8	56	131.82
15	72.5	800	1			1	0	44	163	74	27.852	13.2	49.4	34.4	107	20.1	2.6	4.8	56	131.82
15	84.5	800	1			1	0	44	163	74	27.852	13.2	49.4	34.4	107	20.1	2.6	4.8	56	131.82
15	96.5	800	1			1	0	44	163	74	27.852	13.2	49.4	34.4	107	20.1	2.6	4.8	56	131.82
15	108.5	800	1			1	0	44	163	74	27.852	13.2	49.4	34.4	107	20.1	2.6	4.8	56	131.82
15	120.5	800	1			1	0	44	163	74	27.852	13.2	49.4	34.4	107	20.1	2.6	4.8	56	131.82
15	132.5	800	1			1	0	44	163	74	27.852	13.2	49.4	34.4	107	20.1	2.6	4.8	56	131.82
15	144			2021-12-02	17.67	0	0	44	163	74	27.852	13.2	49.4	34.4	107	20.1	2.6	4.8	56	131.82
15	144.5	800	1			1	0	44	163	74	27.852	13.2	49.4	34.4	107	20.1	2.6	4.8	56	131.82
15	145.583			2021-12-02	58.58	0	0	44	163	74	27.852	13.2	49.4	34.4	107	20.1	2.6	4.8	56	131.82
16	0			2021-10-28	0	0	1	30	175	72.5	23.6735	104	85.7	37.8	101	15.1	8.5	4.1	76	128.281	Negative
16	0.5	800	1			1	1	30	175	72.5	23.6735	104	85.7	37.8	101	15.1	8.5	4.1	76	128.281
16	3.25			2021-10-28	24.5	0	1	30	175	72.5	23.6735	104	85.7	37.8	101	15.1	8.5	4.1	76	128.281
16	12.5	800	1			1	1	30	175	72.5	23.6735	104	85.7	37.8	101	15.1	8.5	4.1	76	128.281
16	24.5	800	1			1	1	30	175	72.5	23.6735	104	85.7	37.8	101	15.1	8.5	4.1	76	128.281
16	36.5	800	1			1	1	30	175	72.5	23.6735	104	85.7	37.8	101	15.1	8.5	4.1	76	128.281
16	48.5	800	1			1	1	30	175	72.5	23.6735	104	85.7	37.8	101	15.1	8.5	4.1	76	128.281
16	60.5	800	1			1	1	30	175	72.5	23.6735	104	85.7	37.8	101	15.1	8.5	4.1	76	128.281
16	72.5	800	1			1	1	30	175	72.5	23.6735	104	85.7	37.8	101	15.1	8.5	4.1	76	128.281
16	84.5	800	1			1	1	30	175	72.5	23.6735	104	85.7	37.8	101	15.1	8.5	4.1	76	128.281
16	96			2021-11-01	3.75	0	1	30	175	72.5	23.6735	104	85.7	37.8	101	15.1	8.5	4.1	76	128.281
16	96.5	800	1			1	1	30	175	72.5	23.6735	104	85.7	37.8	101	15.1	8.5	4.1	76	128.281
16	97.6667			2021-11-01	59.16	0	1	30	175	72.5	23.6735	104	85.7	37.8	101	15.1	8.5	4.1	76	128.281
16	108.5	800	1			1	1	30	175	72.5	23.6735	104	85.7	37.8	101	15.1	8.5	4.1	76	128.281
16	120.5	800	1			1	1	30	175	72.5	23.6735	104	85.7	37.8	101	15.1	8.5	4.1	76	128.281
16	132.5	800	1			1	1	30	175	72.5	23.6735	104	85.7	37.8	101	15.1	8.5	4.1	76	128.281
16	144			2021-11-03	2.98	0	1	30	175	72.5	23.6735	104	85.7	37.8	101	15.1	8.5	4.1	76	128.281
16	144.5	800	1			1	1	30	175	72.5	23.6735	104	85.7	37.8	101	15.1	8.5	4.1	76	128.281
16	145.667			2021-11-03	69.96	0	1	30	175	72.5	23.6735	104	85.7	37.8	101	15.1	8.5	4.1	76	128.281
16	156.5	800	1			1	1	30	175	72.5	23.6735	104	85.7	37.8	101	15.1	8.5	4.1	76	128.281
17	0			2021-11-22	0	0	1	42	172	90	30.4218	110	31.7	37.7	65	20.2	9.5	4.2	85	126.852	Negative
17	0.5	800	1			1	1	42	172	90	30.4218	110	31.7	37.7	65	20.2	9.5	4.2	85	126.852
17	2.16667			2021-11-22	33.2	0	1	42	172	90	30.4218	110	31.7	37.7	65	20.2	9.5	4.2	85	126.852
17	12.5	800	1			1	1	42	172	90	30.4218	110	31.7	37.7	65	20.2	9.5	4.2	85	126.852
17	24.5	800	1			1	1	42	172	90	30.4218	110	31.7	37.7	65	20.2	9.5	4.2	85	126.852
17	36.5	800	1			1	1	42	172	90	30.4218	110	31.7	37.7	65	20.2	9.5	4.2	85	126.852
17	48			2021-11-24	6.74	0	1	42	172	90	30.4218	110	31.7	37.7	65	20.2	9.5	4.2	85	126.852
17	48.5	800	1			1	1	42	172	90	30.4218	110	31.7	37.7	65	20.2	9.5	4.2	85	126.852
17	51.5			2021-11-24	15.31	0	1	42	172	90	30.4218	110	31.7	37.7	65	20.2	9.5	4.2	85	126.852
17	60.5	800	1			1	1	42	172	90	30.4218	110	31.7	37.7	65	20.2	9.5	4.2	85	126.852
17	72.5	800	1			1	1	42	172	90	30.4218	110	31.7	37.7	65	20.2	9.5	4.2	85	126.852
17	84.5	800	1			1	1	42	172	90	30.4218	110	31.7	37.7	65	20.2	9.5	4.2	85	126.852
17	96.5	800	1			1	1	42	172	90	30.4218	110	31.7	37.7	65	20.2	9.5	4.2	85	126.852
17	108.5	800	1			1	1	42	172	90	30.4218	110	31.7	37.7	65	20.2	9.5	4.2	85	126.852
17	120.5	800	1			1	1	42	172	90	30.4218	110	31.7	37.7	65	20.2	9.5	4.2	85	126.852
17	132.5	800	1			1	1	42	172	90	30.4218	110	31.7	37.7	65	20.2	9.5	4.2	85	126.852
17	144.5	800	1			1	1	42	172	90	30.4218	110	31.7	37.7	65	20.2	9.5	4.2	85	126.852
17	156.5	800	1			1	1	42	172	90	30.4218	110	31.7	37.7	65	20.2	9.5	4.2	85	126.852
17	168			2021-11-29	9.59	0	1	42	172	90	30.4218	110	31.7	37.7	65	20.2	9.5	4.2	85	126.852
17	168.5	800	1			1	1	42	172	90	30.4218	110	31.7	37.7	65	20.2	9.5	4.2	85	126.852
17	171.5			2021-11-29	24.69	0	1	42	172	90	30.4218	110	31.7	37.7	65	20.2	9.5	4.2	85	126.852
17	180.5	800	1			1	1	42	172	90	30.4218	110	31.7	37.7	65	20.2	9.5	4.2	85	126.852
17	192.5	800	1			1	1	42	172	90	30.4218	110	31.7	37.7	65	20.2	9.5	4.2	85	126.852
17	204.5	800	1			1	1	42	172	90	30.4218	110	31.7	37.7	65	20.2	9.5	4.2	85	126.852
17	216.5	800	1			1	1	42	172	90	30.4218	110	31.7	37.7	65	20.2	9.5	4.2	85	126.852
17	228.5	800	1			1	1	42	172	90	30.4218	110	31.7	37.7	65	20.2	9.5	4.2	85	126.852
17	240.5	800	1			1	1	42	172	90	30.4218	110	31.7	37.7	65	20.2	9.5	4.2	85	126.852
17	252.5	800	1			1	1	42	172	90	30.4218	110	31.7	37.7	65	20.2	9.5	4.2	85	126.852
17	264			2021-12-03	13.94	0	1	42	172	90	30.4218	110	31.7	37.7	65	20.2	9.5	4.2	85	126.852
17	264.5	800	1			1	1	42	172	90	30.4218	110	31.7	37.7	65	20.2	9.5	4.2	85	126.852
17	266.333			2021-12-03	40.52	0	1	42	172	90	30.4218	110	31.7	37.7	65	20.2	9.5	4.2	85	126.852
17	276.5	800	1			1	1	42	172	90	30.4218	110	31.7	37.7	65	20.2	9.5	4.2	85	126.852
18	0			2021-10-20	0	0	1	53	165	77	28.2828	235.2	13	12	90	11.81	4.43	1.14	53	154.519	S. epidermidis
18	0.333333	800	1			1	1	53	165	77	28.2828	235.2	13	12	90	11.81	4.43	1.14	53	154.519
18	1.83333			2021-10-20	32.53	0	1	53	165	77	28.2828	235.2	13	12	90	11.81	4.43	1.14	53	154.519
18	12.3333	800	1			1	1	53	165	77	28.2828	235.2	13	12	90	11.81	4.43	1.14	53	154.519
18	24.3333	800	1			1	1	53	165	77	28.2828	235.2	13	12	90	11.81	4.43	1.14	53	154.519
18	36.3333	800	1			1	1	53	165	77	28.2828	235.2	13	12	90	11.81	4.43	1.14	53	154.519
18	48.1667			2021-10-22	0.36	0	1	53	165	77	28.2828	235.2	13	12	90	11.81	4.43	1.14	53	154.519
18	48.3333	800	1			1	1	53	165	77	28.2828	235.2	13	12	90	11.81	4.43	1.14	53	154.519
18	50.3333			2021-10-22	17.35	0	1	53	165	77	28.2828	235.2	13	12	90	11.81	4.43	1.14	53	154.519
18	60.3333	800	1			1	1	53	165	77	28.2828	235.2	13	12	90	11.81	4.43	1.14	53	154.519
18	72.3333	800	1			1	1	53	165	77	28.2828	235.2	13	12	90	11.81	4.43	1.14	53	154.519
18	84.3333	800	1			1	1	53	165	77	28.2828	235.2	13	12	90	11.81	4.43	1.14	53	154.519
18	96.3333	800	1			1	1	53	165	77	28.2828	235.2	13	12	90	11.81	4.43	1.14	53	154.519
18	108.333	800	1			1	1	53	165	77	28.2828	235.2	13	12	90	11.81	4.43	1.14	53	154.519
18	120.333	800	1			1	1	53	165	77	28.2828	235.2	13	12	90	11.81	4.43	1.14	53	154.519
18	132.333	800	1			1	1	53	165	77	28.2828	235.2	13	12	90	11.81	4.43	1.14	53	154.519
18	144.167			2021-10-26	1.18	0	1	53	165	77	28.2828	235.2	13	12	90	11.81	4.43	1.14	53	154.519
18	144.333	800	1			1	1	53	165	77	28.2828	235.2	13	12	90	11.81	4.43	1.14	53	154.519
18	146.333			2021-10-26	15.92	0	1	53	165	77	28.2828	235.2	13	12	90	11.81	4.43	1.14	53	154.519
18	156.333	800	1			1	1	53	165	77	28.2828	235.2	13	12	90	11.81	4.43	1.14	53	154.519
19	0			2021-12-04	0	0	0	78	158	74	29.6427	46.5	29	25	50	7.67	2.8	6.92	76	62.73	Negative
19	0.5	800	1			1	0	78	158	74	29.6427	46.5	29	25	50	7.67	2.8	6.92	76	62.73
19	2.5			2021-12-04	33.29	0	0	78	158	74	29.6427	46.5	29	25	50	7.67	2.8	6.92	76	62.73
19	12.5	800	1			1	0	78	158	74	29.6427	46.5	29	25	50	7.67	2.8	6.92	76	62.73
19	24.5	800	1			1	0	78	158	74	29.6427	46.5	29	25	50	7.67	2.8	6.92	76	62.73
19	36.5	800	1			1	0	78	158	74	29.6427	46.5	29	25	50	7.67	2.8	6.92	76	62.73
19	48			2021-12-06	5.72	0	0	78	158	74	29.6427	46.5	29	25	50	7.67	2.8	6.92	76	62.73
19	48.5	800	1			1	0	78	158	74	29.6427	46.5	29	25	50	7.67	2.8	6.92	76	62.73
19	50.5			2021-12-06	37.75	0	0	78	158	74	29.6427	46.5	29	25	50	7.67	2.8	6.92	76	62.73
19	60.5	800	1			1	0	78	158	74	29.6427	46.5	29	25	50	7.67	2.8	6.92	76	62.73
19	72.5	800	1			1	0	78	158	74	29.6427	46.5	29	25	50	7.67	2.8	6.92	76	62.73
19	84.5	800	1			1	0	78	158	74	29.6427	46.5	29	25	50	7.67	2.8	6.92	76	62.73
19	96.5	800	1			1	0	78	158	74	29.6427	46.5	29	25	50	7.67	2.8	6.92	76	62.73
19	108.5	800	1			1	0	78	158	74	29.6427	46.5	29	25	50	7.67	2.8	6.92	76	62.73
19	120.5	800	1			1	0	78	158	74	29.6427	46.5	29	25	50	7.67	2.8	6.92	76	62.73
19	132.5	800	1			1	0	78	158	74	29.6427	46.5	29	25	50	7.67	2.8	6.92	76	62.73
19	144			2021-12-10	8.31	0	0	78	158	74	29.6427	46.5	29	25	50	7.67	2.8	6.92	76	62.73
19	144.5	800	1			1	0	78	158	74	29.6427	46.5	29	25	50	7.67	2.8	6.92	76	62.73
19	145.75			2021-12-10	50.36	0	0	78	158	74	29.6427	46.5	29	25	50	7.67	2.8	6.92	76	62.73
19	156.5	800	1			1	0	78	158	74	29.6427	46.5	29	25	50	7.67	2.8	6.92	76	62.73
19	168.5	800	1			1	0	78	158	74	29.6427	46.5	29	25	50	7.67	2.8	6.92	76	62.73
19	180.5	800	1			1	0	78	158	74	29.6427	46.5	29	25	50	7.67	2.8	6.92	76	62.73
19	192.5	800	1			1	0	78	158	74	29.6427	46.5	29	25	50	7.67	2.8	6.92	76	62.73
19	204.5	800	1			1	0	78	158	74	29.6427	46.5	29	25	50	7.67	2.8	6.92	76	62.73
19	216.5	800	1			1	0	78	158	74	29.6427	46.5	29	25	50	7.67	2.8	6.92	76	62.73
19	228.5	800	1			1	0	78	158	74	29.6427	46.5	29	25	50	7.67	2.8	6.92	76	62.73
19	240.5	800	1			1	0	78	158	74	29.6427	46.5	29	25	50	7.67	2.8	6.92	76	62.73
19	252.5	800	1			1	0	78	158	74	29.6427	46.5	29	25	50	7.67	2.8	6.92	76	62.73
19	264.5	800	1			1	0	78	158	74	29.6427	46.5	29	25	50	7.67	2.8	6.92	76	62.73
19	276.5	800	1			1	0	78	158	74	29.6427	46.5	29	25	50	7.67	2.8	6.92	76	62.73
19	288			2021-12-16	17.94	0	0	78	158	74	29.6427	46.5	29	25	50	7.67	2.8	6.92	76	62.73
19	288.5	800	1			1	0	78	158	74	29.6427	46.5	29	25	50	7.67	2.8	6.92	76	62.73
19	290			2021-12-16	39.21	0	0	78	158	74	29.6427	46.5	29	25	50	7.67	2.8	6.92	76	62.73
20	0	800	1			1	1	63	170	63	21.7993	111	6	13.5	78	11.8	5	2.4	56	105.898	Negative
20	12	800	1			1	1	63	170	63	21.7993	111	6	13.5	78	11.8	5	2.4	56	105.898
20	23.5			2021/6/22	3.85	0	1	63	170	63	21.7993	111	6	13.5	78	11.8	5	2.4	56	105.898
20	24	800	1			1	1	63	170	63	21.7993	111	6	13.5	78	11.8	5	2.4	56	105.898
20	27			2021/6/22	13.44	0	1	63	170	63	21.7993	111	6	13.5	78	11.8	5	2.4	56	105.898
20	36	800	1			1	1	63	170	63	21.7993	111	6	13.5	78	11.8	5	2.4	56	105.898
20	47.5			2021/6/23	12.25	0	1	63	170	63	21.7993	111	6	13.5	78	11.8	5	2.4	56	105.898
20	48	800	1			1	1	63	170	63	21.7993	111	6	13.5	78	11.8	5	2.4	56	105.898
20	50			2021/6/23	27.92	0	1	63	170	63	21.7993	111	6	13.5	78	11.8	5	2.4	56	105.898
20	60	800	1			1	1	63	170	63	21.7993	111	6	13.5	78	11.8	5	2.4	56	105.898
20	72	800	1			1	1	63	170	63	21.7993	111	6	13.5	78	11.8	5	2.4	56	105.898
20	84	800	1			1	1	63	170	63	21.7993	111	6	13.5	78	11.8	5	2.4	56	105.898
20	96	800	1			1	1	63	170	63	21.7993	111	6	13.5	78	11.8	5	2.4	56	105.898
20	108	800	1			1	1	63	170	63	21.7993	111	6	13.5	78	11.8	5	2.4	56	105.898
20	120	800	1			1	1	63	170	63	21.7993	111	6	13.5	78	11.8	5	2.4	56	105.898
20	132	800	1			1	1	63	170	63	21.7993	111	6	13.5	78	11.8	5	2.4	56	105.898
20	144	800	1			1	1	63	170	63	21.7993	111	6	13.5	78	11.8	5	2.4	56	105.898
20	156	800	1			1	1	63	170	63	21.7993	111	6	13.5	78	11.8	5	2.4	56	105.898
20	168	800	1			1	1	63	170	63	21.7993	111	6	13.5	78	11.8	5	2.4	56	105.898
20	180	800	1			1	1	63	170	63	21.7993	111	6	13.5	78	11.8	5	2.4	56	105.898
20	192	800	1			1	1	63	170	63	21.7993	111	6	13.5	78	11.8	5	2.4	56	105.898
20	204	800	1			1	1	63	170	63	21.7993	111	6	13.5	78	11.8	5	2.4	56	105.898
20	216	800	1			1	1	63	170	63	21.7993	111	6	13.5	78	11.8	5	2.4	56	105.898
20	228	800	1			1	1	63	170	63	21.7993	111	6	13.5	78	11.8	5	2.4	56	105.898
20	239.5			2021/7/1	9.54	0	1	63	170	63	21.7993	111	6	13.5	78	11.8	5	2.4	56	105.898
20	240	800	1			1	1	63	170	63	21.7993	111	6	13.5	78	11.8	5	2.4	56	105.898
20	242			2021/7/1	22.41	0	1	63	170	63	21.7993	111	6	13.5	78	11.8	5	2.4	56	105.898
20	252	800	1			1	1	63	170	63	21.7993	111	6	13.5	78	11.8	5	2.4	56	105.898
20	264	800	1			1	1	63	170	63	21.7993	111	6	13.5	78	11.8	5	2.4	56	105.898
20	276	800	1			1	1	63	170	63	21.7993	111	6	13.5	78	11.8	5	2.4	56	105.898
20	288	800	1			1	1	63	170	63	21.7993	111	6	13.5	78	11.8	5	2.4	56	105.898
20	300	800	1			1	1	63	170	63	21.7993	111	6	13.5	78	11.8	5	2.4	56	105.898
20	312	800	1			1	1	63	170	63	21.7993	111	6	13.5	78	11.8	5	2.4	56	105.898
20	324	800	1			1	1	63	170	63	21.7993	111	6	13.5	78	11.8	5	2.4	56	105.898
20	336	800	1			1	1	63	170	63	21.7993	111	6	13.5	78	11.8	5	2.4	56	105.898
20	348	800	1			1	1	63	170	63	21.7993	111	6	13.5	78	11.8	5	2.4	56	105.898
20	360	800	1			1	1	63	170	63	21.7993	111	6	13.5	78	11.8	5	2.4	56	105.898
20	372	800	1			1	1	63	170	63	21.7993	111	6	13.5	78	11.8	5	2.4	56	105.898
20	384	800	1			1	1	63	170	63	21.7993	111	6	13.5	78	11.8	5	2.4	56	105.898
20	396	800	1			1	1	63	170	63	21.7993	111	6	13.5	78	11.8	5	2.4	56	105.898
20	408	800	1			1	1	63	170	63	21.7993	111	6	13.5	78	11.8	5	2.4	56	105.898
20	420	800	1			1	1	63	170	63	21.7993	111	6	13.5	78	11.8	5	2.4	56	105.898
20	432	800	1			1	1	63	170	63	21.7993	111	6	13.5	78	11.8	5	2.4	56	105.898
20	444	800	1			1	1	63	170	63	21.7993	111	6	13.5	78	11.8	5	2.4	56	105.898
20	456	800	1			1	1	63	170	63	21.7993	111	6	13.5	78	11.8	5	2.4	56	105.898
20	468	800	1			1	1	63	170	63	21.7993	111	6	13.5	78	11.8	5	2.4	56	105.898
20	480	800	1			1	1	63	170	63	21.7993	111	6	13.5	78	11.8	5	2.4	56	105.898
20	492	800	1			1	1	63	170	63	21.7993	111	6	13.5	78	11.8	5	2.4	56	105.898
20	504	800	1			1	1	63	170	63	21.7993	111	6	13.5	78	11.8	5	2.4	56	105.898
20	516	800	1			1	1	63	170	63	21.7993	111	6	13.5	78	11.8	5	2.4	56	105.898
20	528	800	1			1	1	63	170	63	21.7993	111	6	13.5	78	11.8	5	2.4	56	105.898
20	540	800	1			1	1	63	170	63	21.7993	111	6	13.5	78	11.8	5	2.4	56	105.898
20	552	800	1			1	1	63	170	63	21.7993	111	6	13.5	78	11.8	5	2.4	56	105.898
20	564	800	1			1	1	63	170	63	21.7993	111	6	13.5	78	11.8	5	2.4	56	105.898
20	576	800	1			1	1	63	170	63	21.7993	111	6	13.5	78	11.8	5	2.4	56	105.898
20	588	800	1			1	1	63	170	63	21.7993	111	6	13.5	78	11.8	5	2.4	56	105.898
20	599.5			2021-07-16	6.27	0	1	63	170	63	21.7993	111	6	13.5	78	11.8	5	2.4	56	105.898
20	600	800	1			1	1	63	170	63	21.7993	111	6	13.5	78	11.8	5	2.4	56	105.898
20	602			2021-07-16	21.99	0	1	63	170	63	21.7993	111	6	13.5	78	11.8	5	2.4	56	105.898
20	612	800	1			1	1	63	170	63	21.7993	111	6	13.5	78	11.8	5	2.4	56	105.898
21	0			2021-11-22	0	0	0	35	153	46	19.6506	1.59	9.1	16.2	64	11.2	4.4	2.9	49	102.427	Methicillin-sensitive S. aureus
21	0.5	800	1			1	0	35	153	46	19.6506	1.59	9.1	16.2	64	11.2	4.4	2.9	49	102.427
21	2			2021-11-22	47.09	0	0	35	153	46	19.6506	1.59	9.1	16.2	64	11.2	4.4	2.9	49	102.427
21	12.5	800	1			1	0	35	153	46	19.6506	1.59	9.1	16.2	64	11.2	4.4	2.9	49	102.427
21	24.5	800	1			1	0	35	153	46	19.6506	1.59	9.1	16.2	64	11.2	4.4	2.9	49	102.427
21	36.5	800	1			1	0	35	153	46	19.6506	1.59	9.1	16.2	64	11.2	4.4	2.9	49	102.427
21	48.5	800	1			1	0	35	153	46	19.6506	1.59	9.1	16.2	64	11.2	4.4	2.9	49	102.427
21	60.5	800	1			1	0	35	153	46	19.6506	1.59	9.1	16.2	64	11.2	4.4	2.9	49	102.427
21	72.5	800	1			1	0	35	153	46	19.6506	1.59	9.1	16.2	64	11.2	4.4	2.9	49	102.427
21	84.5	800	1			1	0	35	153	46	19.6506	1.59	9.1	16.2	64	11.2	4.4	2.9	49	102.427
21	96.5	800	1			1	0	35	153	46	19.6506	1.59	9.1	16.2	64	11.2	4.4	2.9	49	102.427
21	108.5	800	1			1	0	35	153	46	19.6506	1.59	9.1	16.2	64	11.2	4.4	2.9	49	102.427
21	120.5	800	1			1	0	35	153	46	19.6506	1.59	9.1	16.2	64	11.2	4.4	2.9	49	102.427
21	132.5	800	1			1	0	35	153	46	19.6506	1.59	9.1	16.2	64	11.2	4.4	2.9	49	102.427
21	144			2021-11-28	7.73	0	0	35	153	46	19.6506	1.59	9.1	16.2	64	11.2	4.4	2.9	49	102.427
21	144.5	800	1			1	0	35	153	46	19.6506	1.59	9.1	16.2	64	11.2	4.4	2.9	49	102.427
21	145.583			2021-11-28	81.27	0	0	35	153	46	19.6506	1.59	9.1	16.2	64	11.2	4.4	2.9	49	102.427
21	156.5	800	1			1	0	35	153	46	19.6506	1.59	9.1	16.2	64	11.2	4.4	2.9	49	102.427
21	168			2021-11-29	3.63	0	0	35	153	46	19.6506	1.59	9.1	16.2	64	11.2	4.4	2.9	49	102.427
21	168.5	800	1			1	0	35	153	46	19.6506	1.59	9.1	16.2	64	11.2	4.4	2.9	49	102.427
21	170.5			2021-11-29	33.22	0	0	35	153	46	19.6506	1.59	9.1	16.2	64	11.2	4.4	2.9	49	102.427
21	180.5	800	1			1	0	35	153	46	19.6506	1.59	9.1	16.2	64	11.2	4.4	2.9	49	102.427
22	0			2021-12-21	0	0	0	65	165	55	20.202	99.967	16.6	16.2	139	6.4	4.3	2.8	47	91.1993	Negative
22	0.5	800	1			1	0	65	165	55	20.202	99.967	16.6	16.2	139	6.4	4.3	2.8	47	91.1993
22	2			2021-12-21	37.73	0	0	65	165	55	20.202	99.967	16.6	16.2	139	6.4	4.3	2.8	47	91.1993
22	12.5	800	1			1	0	65	165	55	20.202	99.967	16.6	16.2	139	6.4	4.3	2.8	47	91.1993
22	24.5	800	1			1	0	65	165	55	20.202	99.967	16.6	16.2	139	6.4	4.3	2.8	47	91.1993
22	36.5	800	1			1	0	65	165	55	20.202	99.967	16.6	16.2	139	6.4	4.3	2.8	47	91.1993
22	48.5	800	1			1	0	65	165	55	20.202	99.967	16.6	16.2	139	6.4	4.3	2.8	47	91.1993
22	60.5	800	1			1	0	65	165	55	20.202	99.967	16.6	16.2	139	6.4	4.3	2.8	47	91.1993
22	72			2021-12-24	4.58	0	0	65	165	55	20.202	99.967	16.6	16.2	139	6.4	4.3	2.8	47	91.1993
22	72.5	800	1			1	0	65	165	55	20.202	99.967	16.6	16.2	139	6.4	4.3	2.8	47	91.1993
22	74.5			2021-12-24	24.45	0	0	65	165	55	20.202	99.967	16.6	16.2	139	6.4	4.3	2.8	47	91.1993
22	84.5	800	1			1	0	65	165	55	20.202	99.967	16.6	16.2	139	6.4	4.3	2.8	47	91.1993
22	96.5	800	1			1	0	65	165	55	20.202	99.967	16.6	16.2	139	6.4	4.3	2.8	47	91.1993
22	108.5	800	1			1	0	65	165	55	20.202	99.967	16.6	16.2	139	6.4	4.3	2.8	47	91.1993
22	120			2021-12-26	8.8	0	0	65	165	55	20.202	99.967	16.6	16.2	139	6.4	4.3	2.8	47	91.1993
22	120.5	800	1			1	0	65	165	55	20.202	99.967	16.6	16.2	139	6.4	4.3	2.8	47	91.1993
22	122.167			2021-12-26	34.45	0	0	65	165	55	20.202	99.967	16.6	16.2	139	6.4	4.3	2.8	47	91.1993
22	132.5	800	1			1	0	65	165	55	20.202	99.967	16.6	16.2	139	6.4	4.3	2.8	47	91.1993
22	144			2021-12-27	12.39	0	0	65	165	55	20.202	99.967	16.6	16.2	139	6.4	4.3	2.8	47	91.1993
22	144.5	800	1			1	0	65	165	55	20.202	99.967	16.6	16.2	139	6.4	4.3	2.8	47	91.1993
22	145.75			2021-12-27	41.06	0	0	65	165	55	20.202	99.967	16.6	16.2	139	6.4	4.3	2.8	47	91.1993
22	156.5	800	1			1	0	65	165	55	20.202	99.967	16.6	16.2	139	6.4	4.3	2.8	47	91.1993
23	0			2021-12-30	0	0	1	45	171	47	16.0733	92.6	88	71	160	3.71	1.17	4.63	61	89.4825	Negative
23	0.5	800	1			1	1	45	171	47	16.0733	92.6	88	71	160	3.71	1.17	4.63	61	89.4825
23	2.25			2021-12-30	33.29	0	1	45	171	47	16.0733	92.6	88	71	160	3.71	1.17	4.63	61	89.4825
23	12.5	800	1			1	1	45	171	47	16.0733	92.6	88	71	160	3.71	1.17	4.63	61	89.4825
23	24.5	800	1			1	1	45	171	47	16.0733	92.6	88	71	160	3.71	1.17	4.63	61	89.4825
23	36.5	800	1			1	1	45	171	47	16.0733	92.6	88	71	160	3.71	1.17	4.63	61	89.4825
23	48			2022-01-01	5.72	0	1	45	171	47	16.0733	92.6	88	71	160	3.71	1.17	4.63	61	89.4825
23	48.5	800	1			1	1	45	171	47	16.0733	92.6	88	71	160	3.71	1.17	4.63	61	89.4825
23	50.25			2022-01-01	37.75	0	1	45	171	47	16.0733	92.6	88	71	160	3.71	1.17	4.63	61	89.4825
23	60.5	800	1			1	1	45	171	47	16.0733	92.6	88	71	160	3.71	1.17	4.63	61	89.4825
23	72.5	800	1			1	1	45	171	47	16.0733	92.6	88	71	160	3.71	1.17	4.63	61	89.4825
23	84.5	800	1			1	1	45	171	47	16.0733	92.6	88	71	160	3.71	1.17	4.63	61	89.4825
23	96.5	800	1			1	1	45	171	47	16.0733	92.6	88	71	160	3.71	1.17	4.63	61	89.4825
23	108.5	800	1			1	1	45	171	47	16.0733	92.6	88	71	160	3.71	1.17	4.63	61	89.4825
23	120			2022-01-04	12.31	0	1	45	171	47	16.0733	92.6	88	71	160	3.71	1.17	4.63	61	89.4825
23	120.5	800	1			1	1	45	171	47	16.0733	92.6	88	71	160	3.71	1.17	4.63	61	89.4825
23	121.583			2022-01-04	50.36	0	1	45	171	47	16.0733	92.6	88	71	160	3.71	1.17	4.63	61	89.4825
23	132.5	800	1			1	1	45	171	47	16.0733	92.6	88	71	160	3.71	1.17	4.63	61	89.4825
23	144.5	800	1			1	1	45	171	47	16.0733	92.6	88	71	160	3.71	1.17	4.63	61	89.4825
23	156.5	800	1			1	1	45	171	47	16.0733	92.6	88	71	160	3.71	1.17	4.63	61	89.4825
23	168.5	800	1			1	1	45	171	47	16.0733	92.6	88	71	160	3.71	1.17	4.63	61	89.4825
23	180.5	800	1			1	1	45	171	47	16.0733	92.6	88	71	160	3.71	1.17	4.63	61	89.4825
23	192.5	800	1			1	1	45	171	47	16.0733	92.6	88	71	160	3.71	1.17	4.63	61	89.4825
23	204.5	800	1			1	1	45	171	47	16.0733	92.6	88	71	160	3.71	1.17	4.63	61	89.4825
23	216.5	800	1			1	1	45	171	47	16.0733	92.6	88	71	160	3.71	1.17	4.63	61	89.4825
23	228.5	800	1			1	1	45	171	47	16.0733	92.6	88	71	160	3.71	1.17	4.63	61	89.4825
23	240.5	800	1			1	1	45	171	47	16.0733	92.6	88	71	160	3.71	1.17	4.63	61	89.4825
23	252.5	800	1			1	1	45	171	47	16.0733	92.6	88	71	160	3.71	1.17	4.63	61	89.4825
23	264			2022-01-10	17.94	0	1	45	171	47	16.0733	92.6	88	71	160	3.71	1.17	4.63	61	89.4825
23	264.5	800	1			1	1	45	171	47	16.0733	92.6	88	71	160	3.71	1.17	4.63	61	89.4825
23	266			2022-01-10	39.21	0	1	45	171	47	16.0733	92.6	88	71	160	3.71	1.17	4.63	61	89.4825
24	0			2021-11-18	0	0	0	73	160	55	21.4844	185.2	8	14	79	12	6.1	7.56	97	39.4758	Negative
24	0.5	800	1			1	0	73	160	55	21.4844	185.2	8	14	79	12	6.1	7.56	97	39.4758
24	2.5			2021-11-18	37.35	0	0	73	160	55	21.4844	185.2	8	14	79	12	6.1	7.56	97	39.4758
24	12.5	800	1			1	0	73	160	55	21.4844	185.2	8	14	79	12	6.1	7.56	97	39.4758
24	24.5	800	1			1	0	73	160	55	21.4844	185.2	8	14	79	12	6.1	7.56	97	39.4758
24	36.5	800	1			1	0	73	160	55	21.4844	185.2	8	14	79	12	6.1	7.56	97	39.4758
24	48.5	800	1			1	0	73	160	55	21.4844	185.2	8	14	79	12	6.1	7.56	97	39.4758
24	60.5	800	1			1	0	73	160	55	21.4844	185.2	8	14	79	12	6.1	7.56	97	39.4758
24	72.5	800	1			1	0	73	160	55	21.4844	185.2	8	14	79	12	6.1	7.56	97	39.4758
24	84.5	800	1			1	0	73	160	55	21.4844	185.2	8	14	79	12	6.1	7.56	97	39.4758
24	95.5			2021-11-22	22.67	0	0	73	160	55	21.4844	185.2	8	14	79	12	6.1	7.56	97	39.4758
24	96.5	800	1			1	0	73	160	55	21.4844	185.2	8	14	79	12	6.1	7.56	97	39.4758
24	97.6667			2021-11-22	57.22	0	0	73	160	55	21.4844	185.2	8	14	79	12	6.1	7.56	97	39.4758
24	108.5	800	1			1	0	73	160	55	21.4844	185.2	8	14	79	12	6.1	7.56	97	39.4758
24	120.5	800	1			1	0	73	160	55	21.4844	185.2	8	14	79	12	6.1	7.56	97	39.4758
24	132.5	800	1			1	0	73	160	55	21.4844	185.2	8	14	79	12	6.1	7.56	97	39.4758
24	144.5	800	1			1	0	73	160	55	21.4844	185.2	8	14	79	12	6.1	7.56	97	39.4758
24	156.5	800	1			1	0	73	160	55	21.4844	185.2	8	14	79	12	6.1	7.56	97	39.4758
24	168.5	800	1			1	0	73	160	55	21.4844	185.2	8	14	79	12	6.1	7.56	97	39.4758
24	180.5	800	1			1	0	73	160	55	21.4844	185.2	8	14	79	12	6.1	7.56	97	39.4758
24	192.5	800	1			1	0	73	160	55	21.4844	185.2	8	14	79	12	6.1	7.56	97	39.4758
24	204.5	800	1			1	0	73	160	55	21.4844	185.2	8	14	79	12	6.1	7.56	97	39.4758
24	216.5	800	1			1	0	73	160	55	21.4844	185.2	8	14	79	12	6.1	7.56	97	39.4758
24	228.5	800	1			1	0	73	160	55	21.4844	185.2	8	14	79	12	6.1	7.56	97	39.4758
24	240.5	800	1			1	0	73	160	55	21.4844	185.2	8	14	79	12	6.1	7.56	97	39.4758
24	252.5	800	1			1	0	73	160	55	21.4844	185.2	8	14	79	12	6.1	7.56	97	39.4758
24	264.5	800	1			1	0	73	160	55	21.4844	185.2	8	14	79	12	6.1	7.56	97	39.4758
24	276.5	800	1			1	0	73	160	55	21.4844	185.2	8	14	79	12	6.1	7.56	97	39.4758
24	288			2021-11-30	25.07	0	0	73	160	55	21.4844	185.2	8	14	79	12	6.1	7.56	97	39.4758
24	288.5	800	1			1	0	73	160	55	21.4844	185.2	8	14	79	12	6.1	7.56	97	39.4758
24	289.583			2021-11-30	81.1	0	0	73	160	55	21.4844	185.2	8	14	79	12	6.1	7.56	97	39.4758
24	300.5	800	1			1	0	73	160	55	21.4844	185.2	8	14	79	12	6.1	7.56	97	39.4758
25	0			2022-03-07	0	0	1	73	173	60	20.0475	231.5	10.9	9	82	7.3	3.1	3	104	47.2541	S. epidermidis
25	0.5	800	1			1	1	73	173	60	20.0475	231.5	10.9	9	82	7.3	3.1	3	104	47.2541
25	3			2022-03-07	33.75	0	1	73	173	60	20.0475	231.5	10.9	9	82	7.3	3.1	3	104	47.2541
25	12.5	800	1			1	1	73	173	60	20.0475	231.5	10.9	9	82	7.3	3.1	3	104	47.2541
25	24.5	800	1			1	1	73	173	60	20.0475	231.5	10.9	9	82	7.3	3.1	3	104	47.2541
25	36.5	800	1			1	1	73	173	60	20.0475	231.5	10.9	9	82	7.3	3.1	3	104	47.2541
25	48			2022-03-09	17.65	0	1	73	173	60	20.0475	231.5	10.9	9	82	7.3	3.1	3	104	47.2541
25	48.5	800	1			1	1	73	173	60	20.0475	231.5	10.9	9	82	7.3	3.1	3	104	47.2541
25	51			2022-03-09	36.72	0	1	73	173	60	20.0475	231.5	10.9	9	82	7.3	3.1	3	104	47.2541
25	60.5	800	1			1	1	73	173	60	20.0475	231.5	10.9	9	82	7.3	3.1	3	104	47.2541
25	72.5	800	1			1	1	73	173	60	20.0475	231.5	10.9	9	82	7.3	3.1	3	104	47.2541
25	84.5	800	1			1	1	73	173	60	20.0475	231.5	10.9	9	82	7.3	3.1	3	104	47.2541
25	96.5	800	1			1	1	73	173	60	20.0475	231.5	10.9	9	82	7.3	3.1	3	104	47.2541
25	108.5	800	1			1	1	73	173	60	20.0475	231.5	10.9	9	82	7.3	3.1	3	104	47.2541
25	120.5	800	1			1	1	73	173	60	20.0475	231.5	10.9	9	82	7.3	3.1	3	104	47.2541
25	132.5	800	1			1	1	73	173	60	20.0475	231.5	10.9	9	82	7.3	3.1	3	104	47.2541
25	144			2022-03-13	26.6	0	1	73	173	60	20.0475	231.5	10.9	9	82	7.3	3.1	3	104	47.2541
25	144.5	800	1			1	1	73	173	60	20.0475	231.5	10.9	9	82	7.3	3.1	3	104	47.2541
25	146.5			2022-03-13	57.58	0	1	73	173	60	20.0475	231.5	10.9	9	82	7.3	3.1	3	104	47.2541
25	156.5	800	1			1	1	73	173	60	20.0475	231.5	10.9	9	82	7.3	3.1	3	104	47.2541
25	168.5	800	1			1	1	73	173	60	20.0475	231.5	10.9	9	82	7.3	3.1	3	104	47.2541
25	180.5	800	1			1	1	73	173	60	20.0475	231.5	10.9	9	82	7.3	3.1	3	104	47.2541
25	192.5	800	1			1	1	73	173	60	20.0475	231.5	10.9	9	82	7.3	3.1	3	104	47.2541
25	204.5	800	1			1	1	73	173	60	20.0475	231.5	10.9	9	82	7.3	3.1	3	104	47.2541
25	216			2022-03-16	30.37	0	1	73	173	60	20.0475	231.5	10.9	9	82	7.3	3.1	3	104	47.2541
25	216.5	800	1			1	1	73	173	60	20.0475	231.5	10.9	9	82	7.3	3.1	3	104	47.2541
25	218.5			2022-03-16	61.15	0	1	73	173	60	20.0475	231.5	10.9	9	82	7.3	3.1	3	104	47.2541
25	228.5	800	1			1	1	73	173	60	20.0475	231.5	10.9	9	82	7.3	3.1	3	104	47.2541
26	0			2022-03-04	0	0	0	27	168	54	19.1327	99.967	20	18	80	11	5.9	2.1	60	105.678	Negative
26	0.5	800	1			1	0	27	168	54	19.1327	99.967	20	18	80	11	5.9	2.1	60	105.678
26	2.5			2022-03-04	30.96	0	0	27	168	54	19.1327	99.967	20	18	80	11	5.9	2.1	60	105.678
26	12.5	800	1			1	0	27	168	54	19.1327	99.967	20	18	80	11	5.9	2.1	60	105.678
26	24.5	800	1			1	0	27	168	54	19.1327	99.967	20	18	80	11	5.9	2.1	60	105.678
26	36.5	800	1			1	0	27	168	54	19.1327	99.967	20	18	80	11	5.9	2.1	60	105.678
26	48			2022-03-06	4.57	0	0	27	168	54	19.1327	99.967	20	18	80	11	5.9	2.1	60	105.678
26	48.5	800	1			1	0	27	168	54	19.1327	99.967	20	18	80	11	5.9	2.1	60	105.678
26	50.1667			2022-03-06	36.57	0	0	27	168	54	19.1327	99.967	20	18	80	11	5.9	2.1	60	105.678
26	60.5	800	1			1	0	27	168	54	19.1327	99.967	20	18	80	11	5.9	2.1	60	105.678
26	72.5	800	1			1	0	27	168	54	19.1327	99.967	20	18	80	11	5.9	2.1	60	105.678
26	84.5	800	1			1	0	27	168	54	19.1327	99.967	20	18	80	11	5.9	2.1	60	105.678
26	96.5	800	1			1	0	27	168	54	19.1327	99.967	20	18	80	11	5.9	2.1	60	105.678
26	108.5	800	1			1	0	27	168	54	19.1327	99.967	20	18	80	11	5.9	2.1	60	105.678
26	120.5	800	1			1	0	27	168	54	19.1327	99.967	20	18	80	11	5.9	2.1	60	105.678
26	132.5	800	1			1	0	27	168	54	19.1327	99.967	20	18	80	11	5.9	2.1	60	105.678
26	144			2022-03-10	7.96	0	0	27	168	54	19.1327	99.967	20	18	80	11	5.9	2.1	60	105.678
26	144.5	800	1			1	0	27	168	54	19.1327	99.967	20	18	80	11	5.9	2.1	60	105.678
26	145.75			2022-03-10	43.65	0	0	27	168	54	19.1327	99.967	20	18	80	11	5.9	2.1	60	105.678
26	156.5	800	1			1	0	27	168	54	19.1327	99.967	20	18	80	11	5.9	2.1	60	105.678
26	168.5	800	1			1	0	27	168	54	19.1327	99.967	20	18	80	11	5.9	2.1	60	105.678
26	180.5	800	1			1	0	27	168	54	19.1327	99.967	20	18	80	11	5.9	2.1	60	105.678
27	0	800	1			1	0	63	160	58	22.6562	210.5	15.1	48.6	79	8.9	6	3.8	47	98.7385	Negative
27	12	800	1			1	0	63	160	58	22.6562	210.5	15.1	48.6	79	8.9	6	3.8	47	98.7385
27	24	800	1			1	0	63	160	58	22.6562	210.5	15.1	48.6	79	8.9	6	3.8	47	98.7385
27	25.0833			2022-01-07	58.05	0	0	63	160	58	22.6562	210.5	15.1	48.6	79	8.9	6	3.8	47	98.7385
27	36	800	1			1	0	63	160	58	22.6562	210.5	15.1	48.6	79	8.9	6	3.8	47	98.7385
27	48	800	1			1	0	63	160	58	22.6562	210.5	15.1	48.6	79	8.9	6	3.8	47	98.7385
27	60	800	1			1	0	63	160	58	22.6562	210.5	15.1	48.6	79	8.9	6	3.8	47	98.7385
27	71.5833			2022-01-09	5.19	0	0	63	160	58	22.6562	210.5	15.1	48.6	79	8.9	6	3.8	47	98.7385
27	72	800	1			1	0	63	160	58	22.6562	210.5	15.1	48.6	79	8.9	6	3.8	47	98.7385
27	73.0833			2022-01-09	53.19	0	0	63	160	58	22.6562	210.5	15.1	48.6	79	8.9	6	3.8	47	98.7385
27	84	800	1			1	0	63	160	58	22.6562	210.5	15.1	48.6	79	8.9	6	3.8	47	98.7385
27	96	800	1			1	0	63	160	58	22.6562	210.5	15.1	48.6	79	8.9	6	3.8	47	98.7385
28	0			2021-05-23	0	0	0	43	160	56	21.875	99.967	15	15	62	5.72	2.01	4.12	39	144.731	Negative
28	0.5	800	1			1	0	43	160	56	21.875	99.967	15	15	62	5.72	2.01	4.12	39	144.731
28	2.5			2021-05-23	32.95	0	0	43	160	56	21.875	99.967	15	15	62	5.72	2.01	4.12	39	144.731
28	12.5	800	1			1	0	43	160	56	21.875	99.967	15	15	62	5.72	2.01	4.12	39	144.731
28	24.5	800	1			1	0	43	160	56	21.875	99.967	15	15	62	5.72	2.01	4.12	39	144.731
28	36.5	800	1			1	0	43	160	56	21.875	99.967	15	15	62	5.72	2.01	4.12	39	144.731
28	48.5	800	1			1	0	43	160	56	21.875	99.967	15	15	62	5.72	2.01	4.12	39	144.731
28	60.5	800	1			1	0	43	160	56	21.875	99.967	15	15	62	5.72	2.01	4.12	39	144.731
28	72			2021-05-26	5.76	0	0	43	160	56	21.875	99.967	15	15	62	5.72	2.01	4.12	39	144.731
28	72.5	800	1			1	0	43	160	56	21.875	99.967	15	15	62	5.72	2.01	4.12	39	144.731
28	73.5833			2021-05-26	44.05	0	0	43	160	56	21.875	99.967	15	15	62	5.72	2.01	4.12	39	144.731
28	84.5	800	1			1	0	43	160	56	21.875	99.967	15	15	62	5.72	2.01	4.12	39	144.731
28	96.5	800	1			1	0	43	160	56	21.875	99.967	15	15	62	5.72	2.01	4.12	39	144.731
28	108.5	800	1			1	0	43	160	56	21.875	99.967	15	15	62	5.72	2.01	4.12	39	144.731
28	120.5	800	1			1	0	43	160	56	21.875	99.967	15	15	62	5.72	2.01	4.12	39	144.731
28	132.5	800	1			1	0	43	160	56	21.875	99.967	15	15	62	5.72	2.01	4.12	39	144.731
28	144.5	800	1			1	0	43	160	56	21.875	99.967	15	15	62	5.72	2.01	4.12	39	144.731
28	156.5	800	1			1	0	43	160	56	21.875	99.967	15	15	62	5.72	2.01	4.12	39	144.731
28	168			2021-05-30	11.4	0	0	43	160	56	21.875	99.967	15	15	62	5.72	2.01	4.12	39	144.731
28	168.5	800	1			1	0	43	160	56	21.875	99.967	15	15	62	5.72	2.01	4.12	39	144.731
28	169.667			2021-05-30	41.45	0	0	43	160	56	21.875	99.967	15	15	62	5.72	2.01	4.12	39	144.731
28	180.5	800	1			1	0	43	160	56	21.875	99.967	15	15	62	5.72	2.01	4.12	39	144.731
29	0			2021-05-31	0	0	1	80	163	69	25.9701	206	35	35	119	8.2	4.63	6.93	66	76.6837	Negative
29	0.5	800	1			1	1	80	163	69	25.9701	206	35	35	119	8.2	4.63	6.93	66	76.6837
29	1.75			2021-05-31	42.57	0	1	80	163	69	25.9701	206	35	35	119	8.2	4.63	6.93	66	76.6837
29	12.5	800	1			1	1	80	163	69	25.9701	206	35	35	119	8.2	4.63	6.93	66	76.6837
29	24.5	800	1			1	1	80	163	69	25.9701	206	35	35	119	8.2	4.63	6.93	66	76.6837
29	36.5	800	1			1	1	80	163	69	25.9701	206	35	35	119	8.2	4.63	6.93	66	76.6837
29	48			2021-06-02	11.37	0	1	80	163	69	25.9701	206	35	35	119	8.2	4.63	6.93	66	76.6837
29	48.5	800	1			1	1	80	163	69	25.9701	206	35	35	119	8.2	4.63	6.93	66	76.6837
29	49.6667			2021-06-02	49.1	0	1	80	163	69	25.9701	206	35	35	119	8.2	4.63	6.93	66	76.6837
29	60.5	800	1			1	1	80	163	69	25.9701	206	35	35	119	8.2	4.63	6.93	66	76.6837
29	72.5	800	1			1	1	80	163	69	25.9701	206	35	35	119	8.2	4.63	6.93	66	76.6837
29	84.5	800	1			1	1	80	163	69	25.9701	206	35	35	119	8.2	4.63	6.93	66	76.6837
29	96.5	800	1			1	1	80	163	69	25.9701	206	35	35	119	8.2	4.63	6.93	66	76.6837
29	108.5	800	1			1	1	80	163	69	25.9701	206	35	35	119	8.2	4.63	6.93	66	76.6837
29	120.5	800	1			1	1	80	163	69	25.9701	206	35	35	119	8.2	4.63	6.93	66	76.6837
29	132.5	800	1			1	1	80	163	69	25.9701	206	35	35	119	8.2	4.63	6.93	66	76.6837
29	144			2021-06-06	14.35	0	1	80	163	69	25.9701	206	35	35	119	8.2	4.63	6.93	66	76.6837
29	144.5	800	1			1	1	80	163	69	25.9701	206	35	35	119	8.2	4.63	6.93	66	76.6837
29	145.667			2021-06-06	51.82	0	1	80	163	69	25.9701	206	35	35	119	8.2	4.63	6.93	66	76.6837
29	156.5	800	1			1	1	80	163	69	25.9701	206	35	35	119	8.2	4.63	6.93	66	76.6837
30	0			2022-03-20	0	0	0	58	170	50	17.301	6.2	4	10	58	3.82	1.47	3.55	26	163.861	Negative
30	0.5	800	1			1	0	58	170	50	17.301	6.2	4	10	58	3.82	1.47	3.55	26	163.861
30	2.5			2022-03-20	26.03	0	0	58	170	50	17.301	6.2	4	10	58	3.82	1.47	3.55	26	163.861
30	12.5	800	1			1	0	58	170	50	17.301	6.2	4	10	58	3.82	1.47	3.55	26	163.861
30	24.5	800	1			1	0	58	170	50	17.301	6.2	4	10	58	3.82	1.47	3.55	26	163.861
30	36.5	800	1			1	0	58	170	50	17.301	6.2	4	10	58	3.82	1.47	3.55	26	163.861
30	48			2022-03-22	4.59	0	0	58	170	50	17.301	6.2	4	10	58	3.82	1.47	3.55	26	163.861
30	48.5	800	1			1	0	58	170	50	17.301	6.2	4	10	58	3.82	1.47	3.55	26	163.861
30	51.5			2022-03-22	19.79	0	0	58	170	50	17.301	6.2	4	10	58	3.82	1.47	3.55	26	163.861
30	60.5	800	1			1	0	58	170	50	17.301	6.2	4	10	58	3.82	1.47	3.55	26	163.861
30	72.5	800	1			1	0	58	170	50	17.301	6.2	4	10	58	3.82	1.47	3.55	26	163.861
30	84.5	800	1			1	0	58	170	50	17.301	6.2	4	10	58	3.82	1.47	3.55	26	163.861
30	96.5	800	1			1	0	58	170	50	17.301	6.2	4	10	58	3.82	1.47	3.55	26	163.861
30	108.5	800	1			1	0	58	170	50	17.301	6.2	4	10	58	3.82	1.47	3.55	26	163.861
30	120.5	800	1			1	0	58	170	50	17.301	6.2	4	10	58	3.82	1.47	3.55	26	163.861
30	132.5	800	1			1	0	58	170	50	17.301	6.2	4	10	58	3.82	1.47	3.55	26	163.861
30	144			2022-03-26	8.71	0	0	58	170	50	17.301	6.2	4	10	58	3.82	1.47	3.55	26	163.861
30	144.5	800	1			1	0	58	170	50	17.301	6.2	4	10	58	3.82	1.47	3.55	26	163.861
30	147.5			2022-03-26	23.04	0	0	58	170	50	17.301	6.2	4	10	58	3.82	1.47	3.55	26	163.861
30	156.5	800	1			1	0	58	170	50	17.301	6.2	4	10	58	3.82	1.47	3.55	26	163.861
30	168.5	800	1			1	0	58	170	50	17.301	6.2	4	10	58	3.82	1.47	3.55	26	163.861
30	180.5	800	1			1	0	58	170	50	17.301	6.2	4	10	58	3.82	1.47	3.55	26	163.861
30	216			2022-03-28	10.06	0	0	58	170	50	17.301	6.2	4	10	58	3.82	1.47	3.55	26	163.861
30	216.5	800	1			1	0	58	170	50	17.301	6.2	4	10	58	3.82	1.47	3.55	26	163.861
30	218			2022-03-28	35.72	0	0	58	170	50	17.301	6.2	4	10	58	3.82	1.47	3.55	26	163.861
30	228.5	800	1			1	0	58	170	50	17.301	6.2	4	10	58	3.82	1.47	3.55	26	163.861
31	0			2021-12-29	0	0	0	68	165	65	23.8751	99.967	12.8	13.5	75	16.4	6.5	3.6	52	93.5208	Negative
31	0.5	800	1			1	0	68	165	65	23.8751	99.967	12.8	13.5	75	16.4	6.5	3.6	52	93.5208
31	2.41667			2021-12-29	26.06	0	0	68	165	65	23.8751	99.967	12.8	13.5	75	16.4	6.5	3.6	52	93.5208
31	12.5	800	1			1	0	68	165	65	23.8751	99.967	12.8	13.5	75	16.4	6.5	3.6	52	93.5208
31	24.5	800	1			1	0	68	165	65	23.8751	99.967	12.8	13.5	75	16.4	6.5	3.6	52	93.5208
31	36.5	800	1			1	0	68	165	65	23.8751	99.967	12.8	13.5	75	16.4	6.5	3.6	52	93.5208
31	48			2021-12-31	5.63	0	0	68	165	65	23.8751	99.967	12.8	13.5	75	16.4	6.5	3.6	52	93.5208
31	48.5	800	1			1	0	68	165	65	23.8751	99.967	12.8	13.5	75	16.4	6.5	3.6	52	93.5208
31	50.5			2021-12-31	28.81	0	0	68	165	65	23.8751	99.967	12.8	13.5	75	16.4	6.5	3.6	52	93.5208
31	60.5	800	1			1	0	68	165	65	23.8751	99.967	12.8	13.5	75	16.4	6.5	3.6	52	93.5208
31	72.5	800	1			1	0	68	165	65	23.8751	99.967	12.8	13.5	75	16.4	6.5	3.6	52	93.5208
31	84.5	800	1			1	0	68	165	65	23.8751	99.967	12.8	13.5	75	16.4	6.5	3.6	52	93.5208
31	96.5	800	1			1	0	68	165	65	23.8751	99.967	12.8	13.5	75	16.4	6.5	3.6	52	93.5208
31	108.5	800	1			1	0	68	165	65	23.8751	99.967	12.8	13.5	75	16.4	6.5	3.6	52	93.5208
31	120.5	800	1			1	0	68	165	65	23.8751	99.967	12.8	13.5	75	16.4	6.5	3.6	52	93.5208
31	132.5	800	1			1	0	68	165	65	23.8751	99.967	12.8	13.5	75	16.4	6.5	3.6	52	93.5208
31	144			2022-01-04	7.02	0	0	68	165	65	23.8751	99.967	12.8	13.5	75	16.4	6.5	3.6	52	93.5208
31	144.5	800	1			1	0	68	165	65	23.8751	99.967	12.8	13.5	75	16.4	6.5	3.6	52	93.5208
31	146.5			2022-01-04	32.61	0	0	68	165	65	23.8751	99.967	12.8	13.5	75	16.4	6.5	3.6	52	93.5208
31	156.5	800	1			1	0	68	165	65	23.8751	99.967	12.8	13.5	75	16.4	6.5	3.6	52	93.5208
31	168.5	800	1			1	0	68	165	65	23.8751	99.967	12.8	13.5	75	16.4	6.5	3.6	52	93.5208
31	180.5	800	1			1	0	68	165	65	23.8751	99.967	12.8	13.5	75	16.4	6.5	3.6	52	93.5208
31	192.5	800	1			1	0	68	165	65	23.8751	99.967	12.8	13.5	75	16.4	6.5	3.6	52	93.5208
31	204.5	800	1			1	0	68	165	65	23.8751	99.967	12.8	13.5	75	16.4	6.5	3.6	52	93.5208
31	216.5	800	1			1	0	68	165	65	23.8751	99.967	12.8	13.5	75	16.4	6.5	3.6	52	93.5208
31	228.5	800	1			1	0	68	165	65	23.8751	99.967	12.8	13.5	75	16.4	6.5	3.6	52	93.5208
31	240.5	800	1			1	0	68	165	65	23.8751	99.967	12.8	13.5	75	16.4	6.5	3.6	52	93.5208
31	252.5	800	1			1	0	68	165	65	23.8751	99.967	12.8	13.5	75	16.4	6.5	3.6	52	93.5208
31	264.5	800	1			1	0	68	165	65	23.8751	99.967	12.8	13.5	75	16.4	6.5	3.6	52	93.5208
31	276.5	800	1			1	0	68	165	65	23.8751	99.967	12.8	13.5	75	16.4	6.5	3.6	52	93.5208
31	288.5	800	1			1	0	68	165	65	23.8751	99.967	12.8	13.5	75	16.4	6.5	3.6	52	93.5208
31	300.5	800	1			1	0	68	165	65	23.8751	99.967	12.8	13.5	75	16.4	6.5	3.6	52	93.5208
31	312			2022-01-11	10.46	0	0	68	165	65	23.8751	99.967	12.8	13.5	75	16.4	6.5	3.6	52	93.5208
31	312.5	800	1			1	0	68	165	65	23.8751	99.967	12.8	13.5	75	16.4	6.5	3.6	52	93.5208
31	314			2022-01-11	37.25	0	0	68	165	65	23.8751	99.967	12.8	13.5	75	16.4	6.5	3.6	52	93.5208
31	324.5	800	1			1	0	68	165	65	23.8751	99.967	12.8	13.5	75	16.4	6.5	3.6	52	93.5208
32	0			2021-09-02	0	0	1	78	170	70	24.2215	148	25	30	118	20.81	10.89	3.55	28	189.487	Negative
32	0.5	800	1			1	1	78	170	70	24.2215	148	25	30	118	20.81	10.89	3.55	28	189.487
32	3			2021-09-02	14.07	0	1	78	170	70	24.2215	148	25	30	118	20.81	10.89	3.55	28	189.487
32	12.5	800	1			1	1	78	170	70	24.2215	148	25	30	118	20.81	10.89	3.55	28	189.487
32	24.5	800	1			1	1	78	170	70	24.2215	148	25	30	118	20.81	10.89	3.55	28	189.487
32	36			2021-09-03	7.28	0	1	78	170	70	24.2215	148	25	30	118	20.81	10.89	3.55	28	189.487
32	36.5	800	1			1	1	78	170	70	24.2215	148	25	30	118	20.81	10.89	3.55	28	189.487
32	38.5			2021-09-03	27.36	0	1	78	170	70	24.2215	148	25	30	118	20.81	10.89	3.55	28	189.487
32	48.5	800	1			1	1	78	170	70	24.2215	148	25	30	118	20.81	10.89	3.55	28	189.487
32	60.5	800	1			1	1	78	170	70	24.2215	148	25	30	118	20.81	10.89	3.55	28	189.487
32	72.5	800	1			1	1	78	170	70	24.2215	148	25	30	118	20.81	10.89	3.55	28	189.487
32	84.5	800	1			1	1	78	170	70	24.2215	148	25	30	118	20.81	10.89	3.55	28	189.487
32	96.5	800	1			1	1	78	170	70	24.2215	148	25	30	118	20.81	10.89	3.55	28	189.487
32	108.5	800	1			1	1	78	170	70	24.2215	148	25	30	118	20.81	10.89	3.55	28	189.487
32	120.5	800	1			1	1	78	170	70	24.2215	148	25	30	118	20.81	10.89	3.55	28	189.487
32	132			2021-09-07	22.54	0	1	78	170	70	24.2215	148	25	30	118	20.81	10.89	3.55	28	189.487
32	132.5	800	1			1	1	78	170	70	24.2215	148	25	30	118	20.81	10.89	3.55	28	189.487
32	134.5			2021-09-07	29.65	0	1	78	170	70	24.2215	148	25	30	118	20.81	10.89	3.55	28	189.487
32	144.5	800	1			1	1	78	170	70	24.2215	148	25	30	118	20.81	10.89	3.55	28	189.487
32	156.5	800	1			1	1	78	170	70	24.2215	148	25	30	118	20.81	10.89	3.55	28	189.487
32	168.5	800	1			1	1	78	170	70	24.2215	148	25	30	118	20.81	10.89	3.55	28	189.487
32	180.5	800	1			1	1	78	170	70	24.2215	148	25	30	118	20.81	10.89	3.55	28	189.487
32	192.5	800	1			1	1	78	170	70	24.2215	148	25	30	118	20.81	10.89	3.55	28	189.487
32	204.5	800	1			1	1	78	170	70	24.2215	148	25	30	118	20.81	10.89	3.55	28	189.487
32	216.5	800	1			1	1	78	170	70	24.2215	148	25	30	118	20.81	10.89	3.55	28	189.487
32	228.5	800	1			1	1	78	170	70	24.2215	148	25	30	118	20.81	10.89	3.55	28	189.487
32	240.5	800	1			1	1	78	170	70	24.2215	148	25	30	118	20.81	10.89	3.55	28	189.487
32	252.5	800	1			1	1	78	170	70	24.2215	148	25	30	118	20.81	10.89	3.55	28	189.487
32	264.5	800	1			1	1	78	170	70	24.2215	148	25	30	118	20.81	10.89	3.55	28	189.487
32	276.5	800	1			1	1	78	170	70	24.2215	148	25	30	118	20.81	10.89	3.55	28	189.487
32	288.5	800	1			1	1	78	170	70	24.2215	148	25	30	118	20.81	10.89	3.55	28	189.487
32	300.5	800	1			1	1	78	170	70	24.2215	148	25	30	118	20.81	10.89	3.55	28	189.487
32	312.5	800	1			1	1	78	170	70	24.2215	148	25	30	118	20.81	10.89	3.55	28	189.487
32	324.5	800	1			1	1	78	170	70	24.2215	148	25	30	118	20.81	10.89	3.55	28	189.487
32	336.5	800	1			1	1	78	170	70	24.2215	148	25	30	118	20.81	10.89	3.55	28	189.487
32	348			2021-09-16	26.37	0	1	78	170	70	24.2215	148	25	30	118	20.81	10.89	3.55	28	189.487
32	348.5	800	1			1	1	78	170	70	24.2215	148	25	30	118	20.81	10.89	3.55	28	189.487
32	349.667			2021-09-16	49.92	0	1	78	170	70	24.2215	148	25	30	118	20.81	10.89	3.55	28	189.487
32	360.5	800	1			1	1	78	170	70	24.2215	148	25	30	118	20.81	10.89	3.55	28	189.487
33	0			2021-07-21	0	0	1	64	185	90	26.2966	104.8	23	18.5	124	4.5	3.4	5.9	56	149.319	Methicillin-resistant S. aureus
33	0.5	800	1			1	1	64	185	90	26.2966	104.8	23	18.5	124	4.5	3.4	5.9	56	149.319
33	3			2021-07-21	20.17	0	1	64	185	90	26.2966	104.8	23	18.5	124	4.5	3.4	5.9	56	149.319
33	12.5	800	1			1	1	64	185	90	26.2966	104.8	23	18.5	124	4.5	3.4	5.9	56	149.319
33	24.5	800	1			1	1	64	185	90	26.2966	104.8	23	18.5	124	4.5	3.4	5.9	56	149.319
33	36.5	800	1			1	1	64	185	90	26.2966	104.8	23	18.5	124	4.5	3.4	5.9	56	149.319
33	48.5	800	1			1	1	64	185	90	26.2966	104.8	23	18.5	124	4.5	3.4	5.9	56	149.319
33	60.5	800	1			1	1	64	185	90	26.2966	104.8	23	18.5	124	4.5	3.4	5.9	56	149.319
33	72.5	800	1			1	1	64	185	90	26.2966	104.8	23	18.5	124	4.5	3.4	5.9	56	149.319
33	84.5	800	1			1	1	64	185	90	26.2966	104.8	23	18.5	124	4.5	3.4	5.9	56	149.319
33	96			2021-07-25	6.3	0	1	64	185	90	26.2966	104.8	23	18.5	124	4.5	3.4	5.9	56	149.319
33	96.5	800	1			1	1	64	185	90	26.2966	104.8	23	18.5	124	4.5	3.4	5.9	56	149.319
33	99			2021-07-25	20.95	0	1	64	185	90	26.2966	104.8	23	18.5	124	4.5	3.4	5.9	56	149.319
33	108.5	800	1			1	1	64	185	90	26.2966	104.8	23	18.5	124	4.5	3.4	5.9	56	149.319
33	120.5	800	1			1	1	64	185	90	26.2966	104.8	23	18.5	124	4.5	3.4	5.9	56	149.319
33	132.5	800	1			1	1	64	185	90	26.2966	104.8	23	18.5	124	4.5	3.4	5.9	56	149.319
33	144			2021-07-27	9.24	0	1	64	185	90	26.2966	104.8	23	18.5	124	4.5	3.4	5.9	56	149.319
33	144.5	800	1			1	1	64	185	90	26.2966	104.8	23	18.5	124	4.5	3.4	5.9	56	149.319
33	146.5			2021-07-27	29	0	1	64	185	90	26.2966	104.8	23	18.5	124	4.5	3.4	5.9	56	149.319
33	156.5	800	1			1	1	64	185	90	26.2966	104.8	23	18.5	124	4.5	3.4	5.9	56	149.319
33	168.5	800	1			1	1	64	185	90	26.2966	104.8	23	18.5	124	4.5	3.4	5.9	56	149.319
33	180.5	800	1			1	1	64	185	90	26.2966	104.8	23	18.5	124	4.5	3.4	5.9	56	149.319
33	192.5	800	1			1	1	64	185	90	26.2966	104.8	23	18.5	124	4.5	3.4	5.9	56	149.319
33	204.5	800	1			1	1	64	185	90	26.2966	104.8	23	18.5	124	4.5	3.4	5.9	56	149.319
33	216.5	800	1			1	1	64	185	90	26.2966	104.8	23	18.5	124	4.5	3.4	5.9	56	149.319
33	228.5	800	1			1	1	64	185	90	26.2966	104.8	23	18.5	124	4.5	3.4	5.9	56	149.319
33	240.5	800	1			1	1	64	185	90	26.2966	104.8	23	18.5	124	4.5	3.4	5.9	56	149.319
33	252.5	800	1			1	1	64	185	90	26.2966	104.8	23	18.5	124	4.5	3.4	5.9	56	149.319
33	264.5	800	1			1	1	64	185	90	26.2966	104.8	23	18.5	124	4.5	3.4	5.9	56	149.319
33	276.5	800	1			1	1	64	185	90	26.2966	104.8	23	18.5	124	4.5	3.4	5.9	56	149.319
33	288.5	800	1			1	1	64	185	90	26.2966	104.8	23	18.5	124	4.5	3.4	5.9	56	149.319
33	300.5	800	1			1	1	64	185	90	26.2966	104.8	23	18.5	124	4.5	3.4	5.9	56	149.319
33	312.5	800	1			1	1	64	185	90	26.2966	104.8	23	18.5	124	4.5	3.4	5.9	56	149.319
33	324.5	800	1			1	1	64	185	90	26.2966	104.8	23	18.5	124	4.5	3.4	5.9	56	149.319
33	336.5	800	1			1	1	64	185	90	26.2966	104.8	23	18.5	124	4.5	3.4	5.9	56	149.319
33	348.5	800	1			1	1	64	185	90	26.2966	104.8	23	18.5	124	4.5	3.4	5.9	56	149.319
33	360			2021-08-05	11.42	0	1	64	185	90	26.2966	104.8	23	18.5	124	4.5	3.4	5.9	56	149.319
33	360.5	800	1			1	1	64	185	90	26.2966	104.8	23	18.5	124	4.5	3.4	5.9	56	149.319
33	362.5			2021-08-05	28.25	0	1	64	185	90	26.2966	104.8	23	18.5	124	4.5	3.4	5.9	56	149.319
33	372.5	800	1			1	1	64	185	90	26.2966	104.8	23	18.5	124	4.5	3.4	5.9	56	149.319
34	0			2021-07-27	0	0	1	55	162	60	22.8624	186	50.1	87.9	86	7.5	5.5	7	77	80.9704	Methicillin-resistant S. aureus
34	0.5	800	1			1	1	55	162	60	22.8624	186	50.1	87.9	86	7.5	5.5	7	77	80.9704
34	2.5			2021-07-27	26.21	0	1	55	162	60	22.8624	186	50.1	87.9	86	7.5	5.5	7	77	80.9704
34	12.5	800	1			1	1	55	162	60	22.8624	186	50.1	87.9	86	7.5	5.5	7	77	80.9704
34	24.5	800	1			1	1	55	162	60	22.8624	186	50.1	87.9	86	7.5	5.5	7	77	80.9704
34	36.5	800	1			1	1	55	162	60	22.8624	186	50.1	87.9	86	7.5	5.5	7	77	80.9704
34	48.5	800	1			1	1	55	162	60	22.8624	186	50.1	87.9	86	7.5	5.5	7	77	80.9704
34	60.5	800	1			1	1	55	162	60	22.8624	186	50.1	87.9	86	7.5	5.5	7	77	80.9704
34	72			2021-07-30	4.33	0	1	55	162	60	22.8624	186	50.1	87.9	86	7.5	5.5	7	77	80.9704
34	72.5	800	1			1	1	55	162	60	22.8624	186	50.1	87.9	86	7.5	5.5	7	77	80.9704
34	74			2021-07-30	38.21	0	1	55	162	60	22.8624	186	50.1	87.9	86	7.5	5.5	7	77	80.9704
34	84.5	800	1			1	1	55	162	60	22.8624	186	50.1	87.9	86	7.5	5.5	7	77	80.9704
34	96.5	800	1			1	1	55	162	60	22.8624	186	50.1	87.9	86	7.5	5.5	7	77	80.9704
34	108.5	800	1			1	1	55	162	60	22.8624	186	50.1	87.9	86	7.5	5.5	7	77	80.9704
34	120.5	800	1			1	1	55	162	60	22.8624	186	50.1	87.9	86	7.5	5.5	7	77	80.9704
34	132.5	800	1			1	1	55	162	60	22.8624	186	50.1	87.9	86	7.5	5.5	7	77	80.9704
34	144			2021-08-02	7.69	0	1	55	162	60	22.8624	186	50.1	87.9	86	7.5	5.5	7	77	80.9704
34	144.5	800	1			1	1	55	162	60	22.8624	186	50.1	87.9	86	7.5	5.5	7	77	80.9704
34	147.5			2021-08-02	16.14	0	1	55	162	60	22.8624	186	50.1	87.9	86	7.5	5.5	7	77	80.9704
34	156.5	800	1			1	1	55	162	60	22.8624	186	50.1	87.9	86	7.5	5.5	7	77	80.9704
34	168.5	800	1			1	1	55	162	60	22.8624	186	50.1	87.9	86	7.5	5.5	7	77	80.9704
34	180.5	800	1			1	1	55	162	60	22.8624	186	50.1	87.9	86	7.5	5.5	7	77	80.9704
34	192.5	800	1			1	1	55	162	60	22.8624	186	50.1	87.9	86	7.5	5.5	7	77	80.9704
34	204.5	800	1			1	1	55	162	60	22.8624	186	50.1	87.9	86	7.5	5.5	7	77	80.9704
34	216			2021-08-05	10.15	0	1	55	162	60	22.8624	186	50.1	87.9	86	7.5	5.5	7	77	80.9704
34	216.5	800	1			1	1	55	162	60	22.8624	186	50.1	87.9	86	7.5	5.5	7	77	80.9704
34	218.5			2021-08-05	24.06	0	1	55	162	60	22.8624	186	50.1	87.9	86	7.5	5.5	7	77	80.9704
34	228.5	800	1			1	1	55	162	60	22.8624	186	50.1	87.9	86	7.5	5.5	7	77	80.9704
